Rossi *et al.*, 2019

1 P-glycoprotein detoxification by the Malpighian tubules of the  
2 desert locust

3 Marta Rossi<sup>1\*</sup>, Davide De Battisti<sup>2</sup> and Jeremy E. Niven<sup>1,3\*</sup>

4

5 <sup>1</sup> School of Life Sciences, University of Sussex, Falmer, Brighton BN1 9QG, UK

6 <sup>2</sup> Department of Bioscience, Swansea University, Swansea, Singleton park SA2 8PP, Wales, UK

7 <sup>3</sup> Centre for Computational Neuroscience and Robotics, University of Sussex, Falmer, Brighton BN1 9QG, UK

8 \*Corresponding authors: M.Rossi@sussex.ac.uk (MR) and J.E.Niven@sussex.ac.uk (JEN)

9

10

11

12

13

14

15

16

17

18

19

20

Rossi *et al.*, 2019

## 21 **Abstract**

22 Detoxification is essential for allowing animals to remove toxic substances present in their diet or  
23 generated as a biproduct of their metabolism. By transporting a wide range of potentially noxious  
24 substrates, active transporters of the ABC transporter family play an important role in detoxification.  
25 One such class of transporters are the multidrug resistance P-glycoprotein transporters. Here, we  
26 investigated P-glycoprotein transport in the Malpighian tubules of the desert locust (*Schistocerca*  
27 *gregaria*), a species whose diet includes plants that contain toxic secondary metabolites. To this end,  
28 we studied transporter physiology using a modified Ramsay assay in which *ex vivo* Malpighian tubules  
29 are incubated in different solutions containing the P-glycoprotein substrate dye rhodamine B in  
30 combination with different concentrations of the P-glycoprotein inhibitor verapamil. To determine the  
31 quantity of the P-glycoprotein substrate extruded we developed a simple and cheap method as an  
32 alternative to liquid chromatography–mass spectrometry, radiolabelled alkaloids or confocal  
33 microscopy. Our evidence shows that: (i) the Malpighian tubules contain a P-glycoprotein; (ii) tubule  
34 surface area is positively correlated with the tubule fluid secretion rate; and (iii) as the fluid secretion  
35 rate increases so too does the net extrusion of rhodamine B. We were able to quantify precisely the  
36 relationships between the fluid secretion, surface area, and net extrusion. We interpret these results in  
37 the context of the life history and foraging ecology of desert locusts. We argue that P-glycoproteins  
38 play an important role in the detoxification by contributing to the removal of xenobiotic substances  
39 from the haemolymph, thereby enabling gregarious desert locusts to maintain toxicity through the  
40 ingestion of toxic plants without suffering the deleterious effects themselves.

41

## 42 **Introduction**

43 Insect excretory systems consist primarily of the Malpighian tubules and the hindgut, which act  
44 synergistically to regulate haemolymph composition [1,2]. Malpighian tubules are blind ended tubules  
45 that float in the haemolymph and empty into the gut at the midgut-hindgut junction, secreting primary  
46 urine, the composition of which is modified by water and ion reabsorption in the hindgut [3]. The

Rossi *et al.*, 2019

47 tubules are considered analogous to vertebrate nephrons [2]. Cells of the epithelium forming the tubule  
48 wall express primary and secondary active transporters that move  $K^+$ ,  $Na^+$  and  $Cl^-$  ions into the lumen  
49 creating an osmotic gradient that produces water secretion (for a review see [4]). Insects regulate ion  
50 and water secretion according to their feeding habits and ecological niche. For example,  
51 haematophagous insects must cope with an excess of NaCl and water after a blood meal [5], whereas  
52 phytophagous insects must often cope with a diet rich in  $K^+$  as well as with secondary metabolites [6,7].

53 In addition to osmoregulation, Malpighian tubules play a fundamental role in the removal of  
54 metabolic waste and potentially noxious substances that have been ingested [1,8]. Alkaloids and organic  
55 anions and cations are actively transported by ATP-dependant transporters such as the multidrug  
56 resistance-associated protein 2 (MRP2) and P-glycoproteins (P-gps, multidrug resistance protein  
57 (MDR1) or ABCB1), both members of the ABC transporter family [9,10]. Multidrug resistance-  
58 associated protein 2 (MRP2) transporters are involved in the transport of organic anions [11,12], while  
59 P-glycoproteins transport type II organic cations (>500 Da), hydrophobic and often polyvalent  
60 compounds (e.g. alkaloids and quinones) [13].

61 The presence and physiology of these multidrug transporters have been explored using specific  
62 substrates and selective inhibitors (e.g. [9,11,14]). In the Malpighian tubules of the cricket (*Teleogryllus*  
63 *commodus*) and the fruit fly (*Drosophila melanogaster*), the transepithelial transport of the fluorescent  
64 MRP2 substrate Texas Red is reduced by the MRP2 inhibitors MK571 and probenecid [11], while the  
65 transport of the fluorescent P-glycoprotein substrate daunorubicin is selectively reduced by the P-  
66 glycoprotein inhibitor verapamil [11]. The transport of nicotine by P-glycoprotein transporters has also  
67 been demonstrated in numerous insect species, including the tobacco hornworm (*Manduca sexta* [9]),  
68 fruit fly (*D. melanogaster*), kissing bug (*Rhodnius prolixus*), large milkweed bug (*Oncopeltus*  
69 *fasciatus*), yellow fever mosquito (*Aedes aegypti*), house cricket (*Acheta domesticus*), migratory locust  
70 (*Locusta migratoria*), mealworm beetle (*Tenebrio molitor*), American cockroach (*Periplaneta*  
71 *americana*) and cabbage looper (*Trichoplusia ni*) [15]. In insects, the understanding of the interaction  
72 between xenobiotics (i.e. insecticides, herbicides, miticides and secondary plant metabolites) and P-  
73 glycoprotein transporters is still limited, but there is an increasing interest in understanding how

Rossi *et al.*, 2019

74 different xenobiotics can act synergistically to maximize the efficacy of insecticides in pests or impair  
75 the xenobiotic detoxification of beneficial insects such as honey bees [16].

76 Desert locusts (*Schistocerca gregaria*) are generalist phytophagous insects with aposematic  
77 coloration in the gregarious phase. They feed on a wide range of plants including those, such as  
78 *Schouwia purpurea* and *Hyoscyamus muticus*, that contain toxins to become unpalatable and toxic to  
79 predators [17–20] Nevertheless, it is likely that gregarious desert locusts excrete some of the toxins that  
80 they ingest, relying instead on their gut contents to maintain toxicity [21,22]. Two lines of evidence  
81 suggest that this excretion is likely to involve P-glycoproteins: (1) they are expressed in the Malpighian  
82 tubules of numerous species (e.g. *A. domesticus*, *L. migratoria*, *P. americana*) from orthopteroid orders  
83 [15]; and (2) they are expressed in the blood brain barrier of the desert locust [23]. However, P-  
84 glycoproteins in the Malpighian tubules of desert locusts have not been studied previously.

85 Here we show that xenobiotic transport and extrusion in the Malpighian tubules of the desert  
86 locust is an active process dependent upon P-glycoprotein like transporters using isolated tubules to  
87 perform a modified Ramsay secretion assay [24]. We evaluated the extrusion of the P-glycoprotein  
88 substrate dye rhodamine B (e.g. [25,26]) with or without the addition of the selective P-glycoprotein  
89 inhibitor verapamil (e.g. [23,27,28]). Our results suggest that P-glycoprotein transporters may play an  
90 important role in the xenobiotic detoxification in the Malpighian tubules of the desert locust. By using  
91 linear mixed effect models to account for repeated observations of single tubules and obtaining multiple  
92 tubules from single locusts, we found that tubule surface area more accurately predicts fluid secretion  
93 rate than diameter or length. Moreover, this statistical model allowed us to quantify the influence of the  
94 surface area on the fluid secretion rate in different treatments, and how it changes over time. We found  
95 that the surface area of the tubules positively influences their fluid secretion rate and that the fluid  
96 secretion rate influences the net extrusion of rhodamine B. We propose that this assay may be used in  
97 future to understand the physiology of the P-glycoproteins when exposed to a wide range of different  
98 substances.

99

## 100 **Materials and methods**

Rossi *et al.*, 2019

## 101 **Animals**

102 Fifth instar desert locusts (*Schistocerca gregaria*; Forskål, 1775) were obtained from Peregrine  
103 Livefoods (Essex, UK) and raised under crowded conditions at 28-30°C with 12:12 photoperiod.  
104 Locusts were fed with organic lettuce, fresh wheat seedlings and wheat germ *ad libitum*. Fifth instar  
105 nymphs were checked daily and, within 24 hours post-eclosion, were marked with acrylic paint (Quay  
106 Imports Ltd, Kirkham, Lancashire, UK). Only adult males between 20 and 22 days post-eclosion were  
107 used in the experiments.

108

## 109 **Saline and chemicals**

110 The saline used was adapted from the Ringer solution of Maddrell and Klunswan [6]. Its composition  
111 was: 5.73 g/L NaCl (98 mM), 0.30 g/L KCl (4 mM), 2 mL CaCl<sub>2</sub> solution 1M (2 mM), 1.86 g/L  
112 NaHCO<sub>3</sub> (22 mM), 1.09 g/L NaH<sub>2</sub>P0<sub>4</sub>·2H<sub>2</sub>O (7 mM), 0.19 g/L MgCl<sub>2</sub> (2 mM), 1.80 g/L glucose (10  
113 mM), 0.83 g/L sodium glutamate (4.9 mM), 0.88 g/L sodium citrate (3.5 mM) and 0.37 g/L malic acid  
114 (2.8 mM). The final pH of the saline was 7.15. It was stored at 4°C for a maximum of three days. Stock  
115 solutions of rhodamine B (50 mM and 3 mM) and verapamil hydrochloride (20 mM) were prepared in  
116 water and diluted to the final concentration in the saline. Rhodamine B was applied at 60 µM and  
117 verapamil at 125 µM or 250 µM. All chemicals were purchased from Sigma-Aldrich (UK) or Fisher  
118 Scientific (UK).

119

## 120 **Locust dissection**

121 The locusts were placed in the freezer for 4-5 minutes until sedated. Upon removal from the freezer,  
122 the abdomen was cut transversely ~5 mm from the anus, and holding the head with one hand and the  
123 thorax with the other hand, the head was pulled away from the remainder of the body (Fig 1A) [6]. In  
124 this way, the entire gut with the Malpighian tubules attached was removed from the body. The gut was  
125 placed onto an 8 cm Sylgard® 184 (Dow Corning, Midland, MI, USA) coated Petri dish, filled with

Rossi *et al.*, 2019

126 saline. The head was separated from the saline using modelling clay (Plasticine®) (Fig 1B). The  
127 preparation was pinned at the cut distal end of the gut to prevent it from floating.

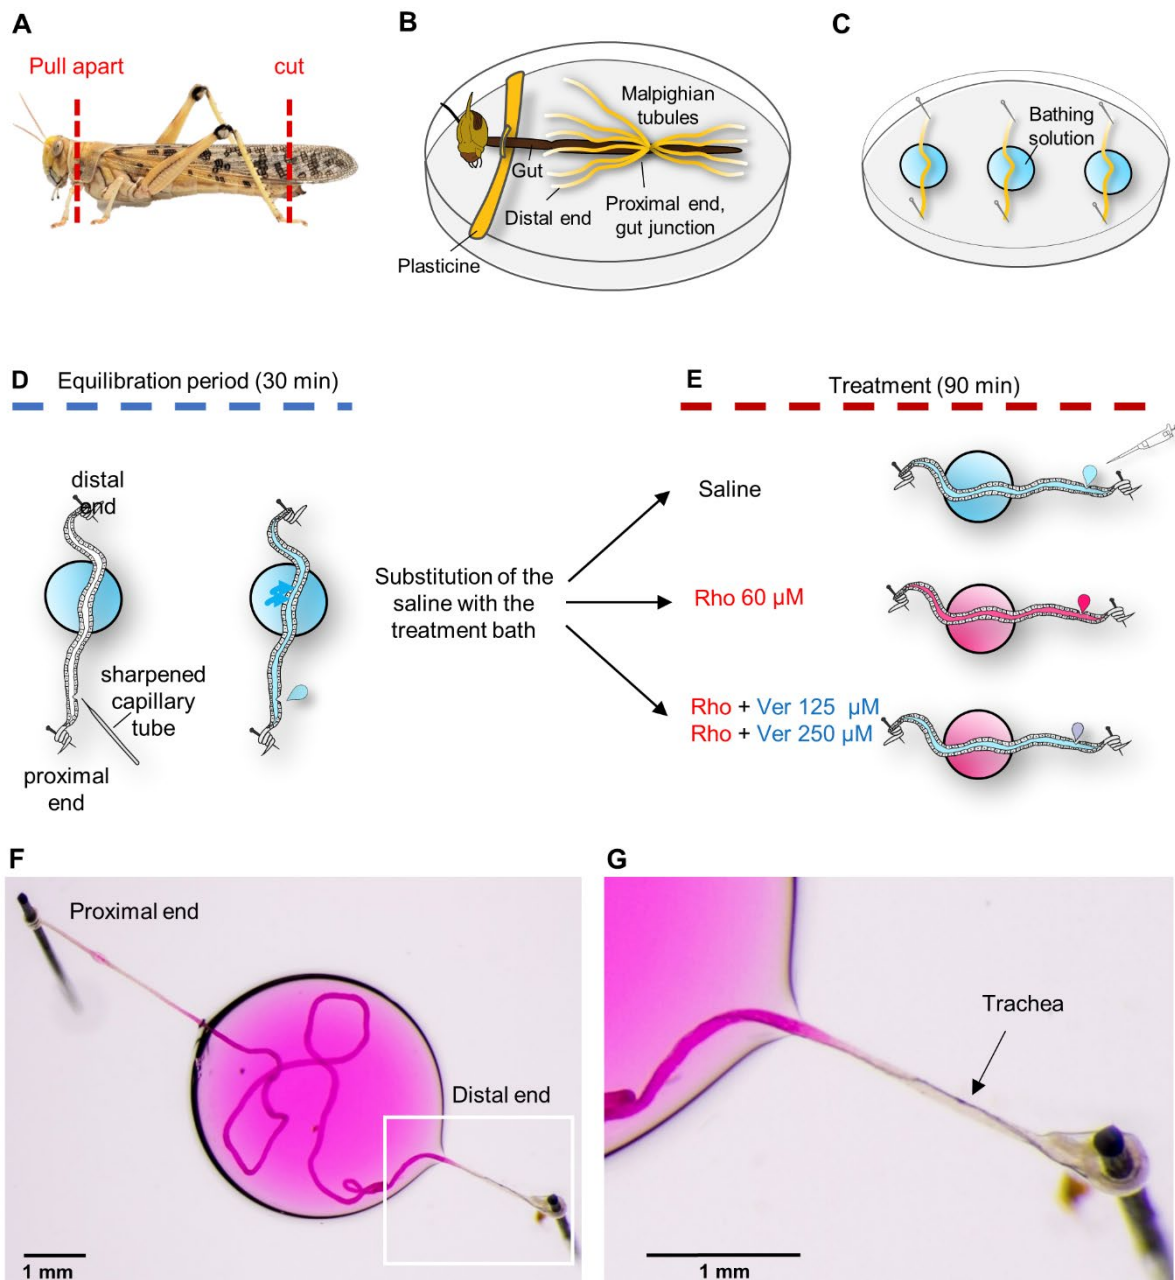

128 **Fig 1. Preparation of Malpighian tubules for *ex vivo* experimentation from the desert locust,**  
129 ***Schistocerca gregaria*, and experimental scheme for assaying the presence of P-glycoproteins**  
130 **within the Malpighian tubules. (A)** Cutting the posterior tip of the abdomen permits removal of the  
131 head and the fully intact gut. **(B)** The gut is submerged in saline and the Malpighian tubules are exposed.  
132 The head is separated from the saline bath by a barrier of modelling clay. **(C)** Three tubules are removed  
133 from each locust and fixed on a Sylgard® surface traversing a small drop of bathing solution, and

Rossi *et al.*, 2019

134 covered with paraffin oil. (D) The proximal and distal ends of individual tubules are wound around  
135 Minuten pins to fix them. Once the saline bath and paraffin oil have been applied, the proximal end of  
136 the tubule is punctured with a sharpened capillary tube to allow fluid secretion. After 30 minutes of  
137 equilibration the saline bath was replaced by a bath containing one of the treatments. (E) Every 30  
138 minutes the secreted droplet was removed, placed on the Petri dish and photographed. (F) An Example  
139 of an isolated Malpighian tubule to perform a modified Ramsay secretion assay. The middle section of  
140 the tubule is immersed in the bathing solution with the respective treatment, while the proximal and  
141 distal ends are fixed outside. (G) Detail of the distal end with the trachea visible. Only a small part of  
142 the trachea is immersed in the bath.

143

## 144 **Malpighian tubules dissection**

145 Using a Nikon SMZ-U (Nikon Corp., Tokyo, Japan) stereoscopic microscope, the Malpighian tubules  
146 were removed by gently pulling the distal part to release them from the gut and cutting the proximal  
147 end at ~5 mm from the gut). Each isolated tubule was moved immediately into a 30  $\mu$ L drop of saline  
148 on a 5 cm Sylgard® coated Petri dish and covered with paraffin oil to prevent desiccation. Both ends  
149 of each Malpighian tubule were pulled out from the saline drop in opposite directions and wrapped  
150 around steel pins pushed into the Sylgard® layer (Fig 1C,D). Three anterior tubules were removed from  
151 each locust. Tracheae coiled around the distal part of the tubule were not removed to prevent any  
152 damage of the tubule surface (Fig 1F,G).

153

## 154 **Fluid secretion (Ramsay) assay**

155 Using a sharpened glass capillary tube, each tubule was punctured near the proximal end to allow the  
156 fluid secretion (Fig 1D). The tubule was allowed to equilibrate for 30 minutes at which point the saline  
157 bath was replaced with 30  $\mu$ L drop containing one of the four different treatments we tested: (i) saline,  
158 (ii) rhodamine B 60  $\mu$ M, (iii) rhodamine B 60  $\mu$ M + verapamil 125  $\mu$ M, (iv) rhodamine B 60  $\mu$ M +  
159 verapamil 250  $\mu$ M (Fig 1E). The first droplet secreted after the bath replacement was discarded. For the  
160 subsequent 90 minutes, the secreted droplet was removed at intervals of 30 minutes (Fig 1E,F) using a

Rossi *et al.*, 2019

161 P10 pipette (Gilson Scientific UK, Dunstable, Bedfordshire, UK) and photographed with a digital  
162 camera (Canon EOS 7D; Canon, Tokyo, Japan) mounted with two custom attachments (Best scientific  
163 A clamp via 1.6 x Canon mount; Leica 10445930 1.0 x) on the stereoscopic microscope (Nikon SMZ-  
164 U; Nikon Corp., Tokyo, Japan). Images were shot in raw format and processed with ImageJ v.1.51p  
165 software [29]. To prevent the photobleaching of the rhodamine B, we minimised light exposure by  
166 conducting the experiment under red light and keeping the sample in a custom designed dark box  
167 between measurements.

168

## 169 **Droplet measurement**

170 The diameter ( $\mu\text{m}$ ) of each secreted droplet (S1 Fig) was measured to calculate its volume (nL) using  
171 the sphere formula, where  $V$  is the drop volume and  $d$  the droplet diameter. The volume was converted  
172 from  $\mu\text{m}^3$  to nL using the formula:  $V = \frac{4}{3} \pi \left(\frac{d}{2}\right)^3 10^{-6}$ .

173 For each tubule, we calculated the fluid secretion rate (nL/min), given by the droplet volume divided  
174 by the time between samples (30 mins). For each droplet, we also measured colour intensity to estimate  
175 the rhodamine B concentration ( $\mu\text{M}$ ) from a calibration curve (see below). To estimate the number of  
176 moles of rhodamine B extruded per minute, we calculated the net extrusion of rhodamine B (fmol/min)  
177 as the product of the fluid secretion rate and the rhodamine B concentration.

178

## 179 **Rhodamine B calibration curve**

180 The intensity of the droplets depends not only on rhodamine B concentration, but also on the droplet  
181 diameter (S2 and S3 Figs). So, we constructed a calibration curve for rhodamine B concentration to  
182 estimate the rhodamine B concentration of the droplets secreted. We prepared standard solutions of  
183 known rhodamine B concentrations: 0, 15, 30, 50, 60, 75, 120, 150, 240 and 480  $\mu\text{M}$ . For each  
184 concentration, droplets of different sizes were placed on a Petri dish coated with Sylgard® and covered  
185 with paraffin oil. We photographed the droplets against a white background at the same light intensity,



Rossi *et al.*, 2019

186 and white balancing the camera before shooting. All the images were analysed subsequently using  
187 ImageJ v.1.51p software [29].

188 Droplet colour varied from white (transparent droplet at rhodamine B concentration = 0  $\mu\text{M}$ )  
189 to intense pink, depending upon the rhodamine B concentration. We split each image into the  
190 component colour channels and measured the intensity of the green channel. To control for the  
191 background, we compared the mean intensity inside the droplet with that outside using the formula  $I =$   
192  $I_i - I_o$ , where  $I$  is the intensity,  $I_i$  is the intensity inside the droplet, and  $I_o$  is the intensity outside the  
193 droplet. We used a range of droplet diameters from 138  $\mu\text{m}$  to 999  $\mu\text{m}$ .

194 To validate the reliability of using the green channel, we also measured the magenta channel  
195 and the total intensity using Adobe Photoshop CC v. 19.1.1 (Adobe Systems Incorporated, CA, USA).  
196 Both the magenta channel and total intensity correlated with the intensity of green channel (Pearson's  
197 correlation, Magenta:  $p < 0.001$ ,  $df = 17$ ,  $R^2 = 1$ ; Total intensity:  $p < 0.001$ ,  $df = 17$ ,  $R^2 = 0.99$ ).

198 The relationship between the intensity and the rhodamine concentration depends upon the  
199 diameter of the droplet (S2 Fig). For each droplet diameter rank, the relationship between the intensity  
200 measured and the known rhodamine concentration can be described by a linear model. To determine  
201 the rhodamine concentration given the intensity and the diameter of the droplets, for each diameter rank  
202 we ran a linear regression model forced through the origin, with intensity as the independent variable  
203 and rhodamine concentration as the response variable (linear model: rhodamine concentration  $\sim$   
204 intensity - 1). Hence, for each diameter rank we obtained the equation that predicts the rhodamine  
205 concentration from the intensity measured, given a specific diameter (S2 Fig).

206 The slope of the linear equations decreases as the diameter increases, following an exponential  
207 decay (S3A Fig). To obtain the equation that predicts the slope of the linear equations for a given  
208 diameter, we log transformed both axis and we ran a log-level regression model (Linear model:  $\log$   
209 (slope)  $\sim \log$  (droplet diameter); S3B Fig). The resulting equation was:  $\log(\text{slope})_i = -1.44 \cdot$   
210  $\log(\text{diameter})_i + 10.38$ .

211 Using the predict command in R, we used the model to predict the slope value (back transformed to the  
212 original scale) for each diameter of the droplets we collected in the experiment. Finally, we multiplied  
213 the slope value for the intensity measured to calculate the rhodamine concentration of each droplet.

Rossi *et al.*, 2019

214

## 215 **Malpighian tubule measurement**

216 At the end of the assay, the tubule was photographed to measure its diameter ( $\mu\text{m}$ ). The length (mm) of  
217 the tubule in contact with the treatment solution, was measured by cutting off the two extremities of the  
218 tubule outside the bath, laying the remaining section of tubule flat on the Sylgard® base, and  
219 photographing it. The surface ( $\text{mm}^2$ ) of the tubule in contact with the bath, was calculated from the  
220 cylinder formula:  $S = 2\pi \left(\frac{d}{2}\right) l$ , where  $S$  is the tubule surface,  $d$  is the tubule diameter, and  $l$  is the  
221 tubule length.

222

## 223 **Statistical Analysis**

224 All the statistical analysis was conducted in R version 3.4.1 [30]. We performed Linear Mixed Effect  
225 Models (LMEM) by restricted maximum likelihood (REML) estimation by using the lmer function  
226 from the ‘lme4’ package [31]. We used the Akaike information criterion (AIC) [32] for model selection.  
227 Significances of the fixed effects were determined using Satterthwaite’s method for estimation of  
228 degrees of freedom by using the anova function from the ‘lmerTest’ [33]. The non-significant  
229 interactions ( $P>0.05$ ) were removed. However, we retained all the main effects even if they were not  
230 statistically significant to avoid an increase in the type I error rate [34]. Estimated marginal means and  
231 pairwise comparisons were obtained using the ‘lsmeans’ package [35] and the p value adjusted with the  
232 Tukey method. All plots were made using the ‘ggplot2’ package [36].

233 To investigate the effect of the treatments on the fluid secretion rate and the net extrusion of  
234 rhodamine B, we analysed the interaction between the treatment (categorical), time of incubation  
235 (categorical) and the surface area (continuous ( $\text{mm}^2$ )). For the rhodamine B concentration, we analysed  
236 the interaction between treatment (categorical) and time (categorical). To account for the nested  
237 structure of data, we included the individual locust as random intercept in the model. We also included  
238 tubule identity as a random intercept and time as random slope to account for the repeated  
239 measurements on the same individual tubule. To investigate the effect of the fluid secretion rate on the

Rossi *et al.*, 2019

240 net extrusion of rhodamine B we analysed the interaction of the variables secretion rate, treatment and  
241 time including as before the individual locust as random intercept, and tubule identity as a random  
242 intercept and time as random slope. To simplify the interpretation of the regression estimates, we  
243 centred the surface variable on its mean. Therefore, all the estimates and comparisons are referred to a  
244 tubule with a mean surface area.

245

## 246 **Results**

247 We prepared three Malpighian tubules from each locust (see Materials and Methods; Fig 1). Each tubule  
248 was punctured near the proximal end to allow the luminal fluid to be secreted and then they were  
249 allowed to equilibrate in the saline bath for 30 minutes (Fig 1D). The saline bath was then replaced with  
250 one of four treatments: saline (control); rhodamine B 60  $\mu\text{M}$  (R60); rhodamine B 60  $\mu\text{M}$  + verapamil  
251 125  $\mu\text{M}$  (V125); and rhodamine B 60  $\mu\text{M}$  + verapamil 250  $\mu\text{M}$  (V250) (Fig 1E). Six locusts were used  
252 for each of the treatments except for the R60 treatment in which eight locusts were used. Every 30  
253 minutes the droplet secreted by the tubule during the Ramsay assay was removed.

254

### 255 **Fluid secretion rate and surface area**

256 We determined the fluid secretion rate of each tubule from the volume of the droplet secreted after each  
257 30-minute interval up to 90 minutes after the start of the treatment. Thus, for each tubule we had three  
258 measurements of the secretion rate in each of the four treatments. In total, there were 233 treatment  
259 observations (one droplet was lost after 60 minutes for the V250 treatment) from 78 Malpighian tubules.

260 To determine whether the surface area of the Malpighian tubules exposed to the bath solution  
261 influences the fluid secretion rate, we measured the length and diameter of each tubule immersed in the  
262 saline or treatment. By comparing linear mixed effect models that incorporated these measurements of  
263 length, diameter or surface area, we determined that surface area was the best explanatory variable (S1  
264 Table). There was no difference in the surface area of Malpighian tubules exposed to the bathing

Rossi *et al.*, 2019

265 solution among the treatments ( $F_{3,22.02}=0.488$ ,  $p=0.694$ ; Control:  $2.00 \pm 0.09 \text{ mm}^2$  (mean  $\pm$  S.E.); R60:  
 266  $2.01 \pm 0.06 \text{ mm}^2$ ; V125:  $2.27 \pm 0.06 \text{ mm}^2$ ; V250:  $2.29 \pm 0.07 \text{ mm}^2$ ).

267 The surface area of the tubule exposed in the bathing solution influenced the fluid secretion  
 268 rate depending on the treatment ( $F_{3,66.29}=3.25$ ,  $p=0.027$ ; Fig 2; Table 1A). Throughout the whole period  
 269 of incubation, the surface area positively influenced the fluid secretion of tubules incubated in R60,  
 270 V125 and Saline, while the V250 treatment the tubules showed no significant correlation between  
 271 surface area and fluid secretion rate (Fig 2C; Table 1A). Having incorporated tubule surface area into  
 272 our statistical model, we were able to compare the fluid secretion rates of our control and treatments  
 273 objectively. The fluid secretion rate decreased over time irrespective of the treatment ( $F_{2,82.36}=46.12$ ,  
 274  $p<.001$ ; Time 60 vs Time 30:  $-0.12 \pm 0.01 \text{ nL/min}$ ,  $p<.001$ ; Time 90 vs Time 60:  $-0.04 \pm 0.01 \text{ nL/min}$ ,  
 275  $p=0.013$ ; Fig 3, Table 1B) and at each time point there was no significant difference between treatments  
 276 (Fig 3, Table 1C).

277

278 **Table 1. Outcomes of the linear mixed effect model investigating the effect of time of incubation,**  
 279 **treatment, and surface area on the fluid secretion rate (SR) of Malpighian tubules.**

280

|          | Treatment | Time 30, 60, 90        |                 |
|----------|-----------|------------------------|-----------------|
|          |           | surface trend $\pm$ se | P-value         |
| <b>A</b> | R60       | $0.16 \pm 0.04$        | <b>&lt;.001</b> |
|          | V125      | $0.14 \pm 0.05$        | <b>0.006</b>    |
|          | V250      | $0.02 \pm 0.04$        | 0.569           |
|          | Saline    | $0.16 \pm 0.04$        | <b>&lt;.001</b> |

  

|          | Treatment       | Time 30       | Time 60         | Time 90         | SR decrease              | SR decrease              |      |
|----------|-----------------|---------------|-----------------|-----------------|--------------------------|--------------------------|------|
|          |                 | Mean $\pm$ se | Mean $\pm$ se   | Mean $\pm$ se   | between<br>30 and 60 min | between<br>60 and 90 min |      |
| <b>B</b> | Fluid secretion | R60           | $0.44 \pm 0.05$ | $0.32 \pm 0.05$ | $0.28 \pm 0.04$          | -27%                     | -13% |
|          | rate (nL/min)   | Saline        | $0.46 \pm 0.05$ | $0.33 \pm 0.05$ | $0.30 \pm 0.05$          | -28%                     | -9%  |
|          |                 | V125          | $0.36 \pm 0.05$ | $0.24 \pm 0.05$ | $0.20 \pm 0.05$          | -33%                     | -17% |
|          |                 | V250          | $0.30 \pm 0.05$ | $0.18 \pm 0.05$ | $0.15 \pm 0.05$          | -40%                     | -17% |

281

282

283

284

285

Rossi *et al.*, 2019

|          | Treatment      | Time 30, 60, 90   |         |
|----------|----------------|-------------------|---------|
|          |                | estimate $\pm$ se | P-value |
| <b>C</b> | V125 vs R60    | -0.08 $\pm$ 0.07  | 0.662   |
|          | V250 vs R60    | -0.13 $\pm$ 0.07  | 0.213   |
|          | Saline vs R60  | 0.02 $\pm$ 0.07   | 0.995   |
|          | V250 vs V125   | -0.06 $\pm$ 0.07  | 0.850   |
|          | Saline vs V125 | 0.09 $\pm$ 0.07   | 0.572   |
|          | Saline vs V250 | 0.15 $\pm$ 0.09   | 0.182   |

286

287 The model applied was (Secretion rate  $\sim$  surface \* treatment + time + (1|locust) + (1+time|tubule)). (A)

288 Estimates of the influence of each unit of surface (mm<sup>2</sup>) on the fluid secretion rate for each treatment.

289 (B) Summary of the mean values for each treatment at each time point. (C) Pairwise comparisons

290 between treatments for each time of incubation.

291

292

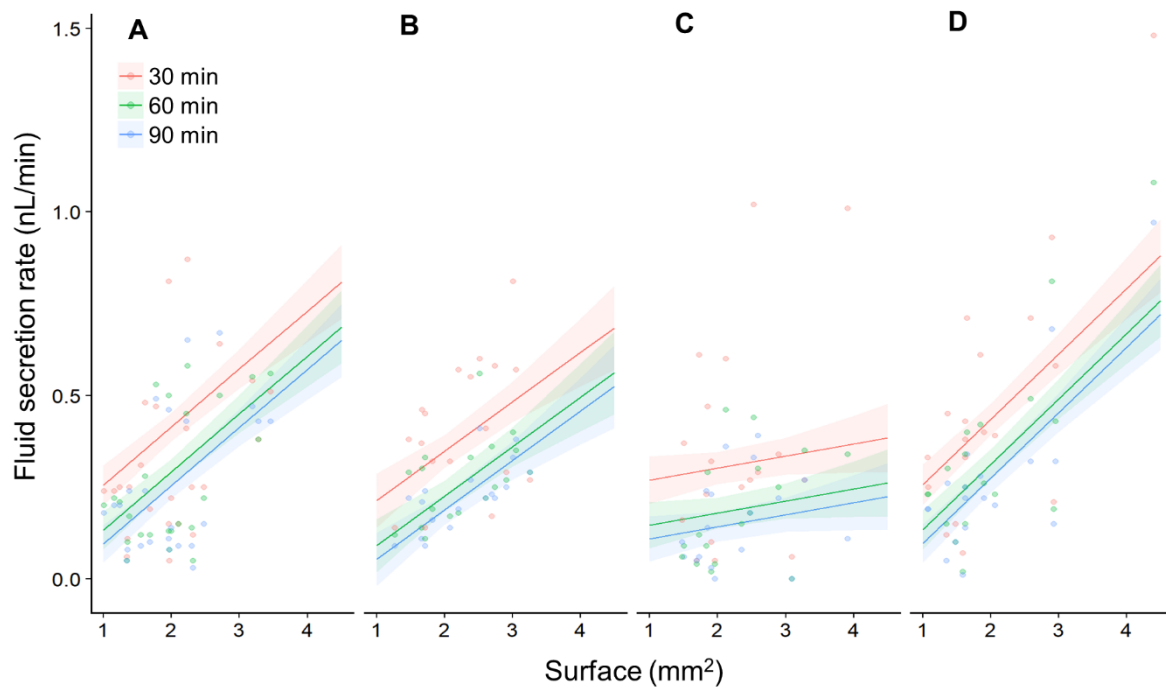

293 **Fig 2. Tubule surface area positively influences the fluid secretion rate.** (A) A plot of the surface  
294 area of the tubule exposed to the bath versus the fluid secretion rate for the R60 treatment every 30  
295 minutes. (B) As in 'A' but for the V125 treatment. (C) As in 'A' but for V250 treatment. (D) As in 'A'  
296 but for the saline treatment. Small circles indicate the fluid secretion rates of individual tubules at a  
297 particular time point. Each line with the shaded area around represents the mixed effect model fit with  
298 the standard error.

299

Rossi *et al.*, 2019

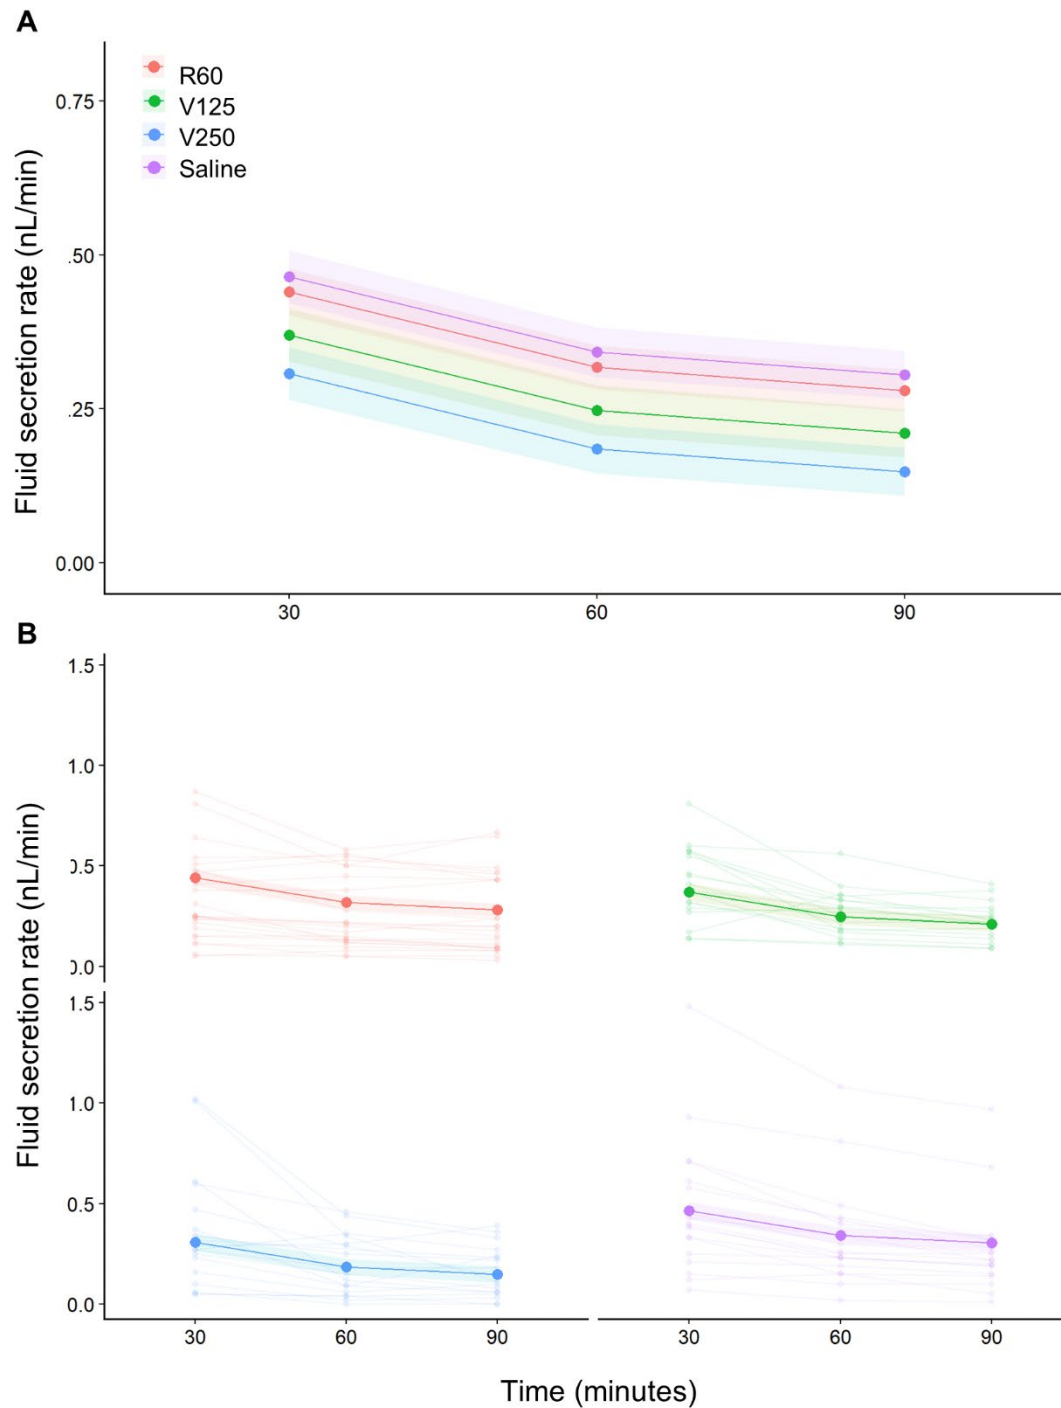

300 **Fig 3. Mean fluid secretion rate of Malpighian tubules during the incubation period.** (A) The mean  
301 fluid secretion rate decreased after 60 minutes of incubation in all the treatments, while it remained  
302 steady for the next 30 minutes in all the treatments except in the saline one. Each line with the shaded  
303 area around represents the mixed effect model fit with the standard error. (B) As in 'A', but with the  
304 fluid secretion rate of individual tubules shown by pale lines linking smaller dots.

305

Rossi *et al.*, 2019

## 306 **Renewing bath saline increases the fluid secretion rate**

307 To exclude the possibility that the decrease in the fluid secretion rate was caused by a damage of the  
308 tubules during the Ramsay assay, we replaced the saline bath after 90 minutes with fresh saline, to  
309 determine whether tubules would increase their fluid secretion rate to previous levels. We removed  
310 three tubules from six locusts (17 tubules in total, one tubule excluded) and incubated them in saline  
311 for 90 minutes, removing the droplet secreted every 30 minutes. After 90 minutes the saline bath was  
312 removed, replaced with fresh saline. The tubules were then incubated for further 90 minutes removing  
313 the droplet secreted every 30 minutes. The secretion rate decreased after 60 and 90 minutes (S4 Fig, S2  
314 Table), but increased after 120 minutes following replacement of the saline (S4 Fig, S2 Table).

315

## 316 **Malpighian tubule integrity during the Ramsay assay**

317 To exclude the possibility that manipulation during the Ramsay assay altered the diameter of the  
318 tubules, we measured the diameter of the tubules *in vivo*, at the beginning, and at the end of the assay.  
319 We found that the diameter of the tubules was unaffected by the assay and was comparable to the  
320 tubule's diameter *in vivo* (S5 Fig, S3A,B Table).

321

## 322 **Net extrusion of Rhodamine B**

323 We determined the concentration of Rhodamine B in each of the droplets collected from the Malpighian  
324 tubules exposed to the R60, V125 and V250 treatments at each time point. There was a significant  
325 interaction between treatment and time ( $F_{4,73.19}=15.19$ ,  $p<.001$ , Fig 4A), indicating that the rhodamine  
326 B concentration changed over time depending on the treatment (Table 2). The concentration of  
327 rhodamine B in the droplets significantly increased during the incubation time in all the treatments  
328 (Table 1B, Fig 4A). In particular, the increase in rhodamine B concentration in the R60 treatment was  
329 more pronounced than in either the V125 or V250 treatments (Table 1C, Fig 4A). At each time point,  
330 the treatment significantly affected the rhodamine B concentration. Compared to the R60 treatment, the  
331 addition of verapamil in the V125 and V250 treatments reduced the rhodamine B concentration of the



Rossi *et al.*, 2019

332 secreted droplets after 30, 60, and 90 minutes (Table 2D, Fig 4A). However, there was no significant  
 333 difference in the rhodamine B concentration between the V125 and V250 treatments at any time point  
 334 (Table 2D, Fig 4A).

335

336 **Table 2. The outcomes of linear mixed effect model used to investigate the effect of incubation**  
 337 **time and treatment on the rhodamine concentration of the droplets secreted.**

|          |                        | Treatment | Time 30<br>Mean ± se | Time 60<br>Mean ± se | Time 90<br>Mean ± se |
|----------|------------------------|-----------|----------------------|----------------------|----------------------|
| <b>A</b> | Rho concentration (µM) | R60       | 59.0 ± 7.3           | 217.9 ± 13.7         | 369.7 ± 22.4         |
|          |                        | V125      | 9.0 ± 8.5            | 54.0 ± 15.8          | 103.4 ± 25.9         |
|          |                        | V250      | 10.4 ± 8.5           | 74.4 ± 15.9          | 135.2 ± 25.9         |

|          | Treatment | Time 60 vs time 30 |              | Time 90 vs time 60 |              |
|----------|-----------|--------------------|--------------|--------------------|--------------|
|          |           | estimate ± se      | P-value      | estimate ± se      | P-value      |
| <b>B</b> | R60       | 158.9 ± 11.8       | <.001        | 151.8 ± 11.8       | <.001        |
|          | V125      | 45 ± 13.6          | <b>0.004</b> | 49.4 ± 13.6        | <b>0.001</b> |
|          | V250      | 64 ± 13.7          | <.001        | 60.8 ± 13.7        | <.001        |

|          |              |              |       |             |       |
|----------|--------------|--------------|-------|-------------|-------|
| <b>C</b> | V125 vs R60  | -113.9 ± 18  | <.001 | -102.4 ± 18 | <.001 |
|          | V250 vs R60  | -94.9 ± 18.1 | <.001 | -91 ± 18.1  | <.001 |
|          | V250 vs V125 | 19 ± 19.3    | 0.588 | 11.4 ± 19.3 | 0.826 |

|          | Treatment    | Time 30       |         | Time 60        |         | Time 90        |         |
|----------|--------------|---------------|---------|----------------|---------|----------------|---------|
|          |              | estimate ± se | P-value | estimate ± se  | P-value | estimate ± se  | P-value |
| <b>D</b> | V125 vs R60  | -49.98 ± 11.2 | <.001   | -163.88 ± 20.9 | <.001   | -266.31 ± 34.2 | <.001   |
|          | V250 vs R60  | -48.59 ± 11.2 | <.001   | -143.49 ± 21.0 | <.001   | -234.53 ± 34.2 | <.001   |
|          | V250 vs V125 | 1.39 ± 12.0   | 0.993   | 20.4 ± 22.5    | 0.637   | 31.78 ± 36.6   | 0.662   |

338 The model applied was (Rhodamine concentration ~ time \* treatment + (1|locust) + (1+time|tubule)).

339 (A) Summary of the mean values for each treatment at each time point. (B) Pairwise comparisons

340 between time of incubation separately for each treatment. (C) Pairwise comparison of the interaction

341 between time and treatment. D) Pairwise comparisons between treatments separately for each time of

342 incubation.

343

344

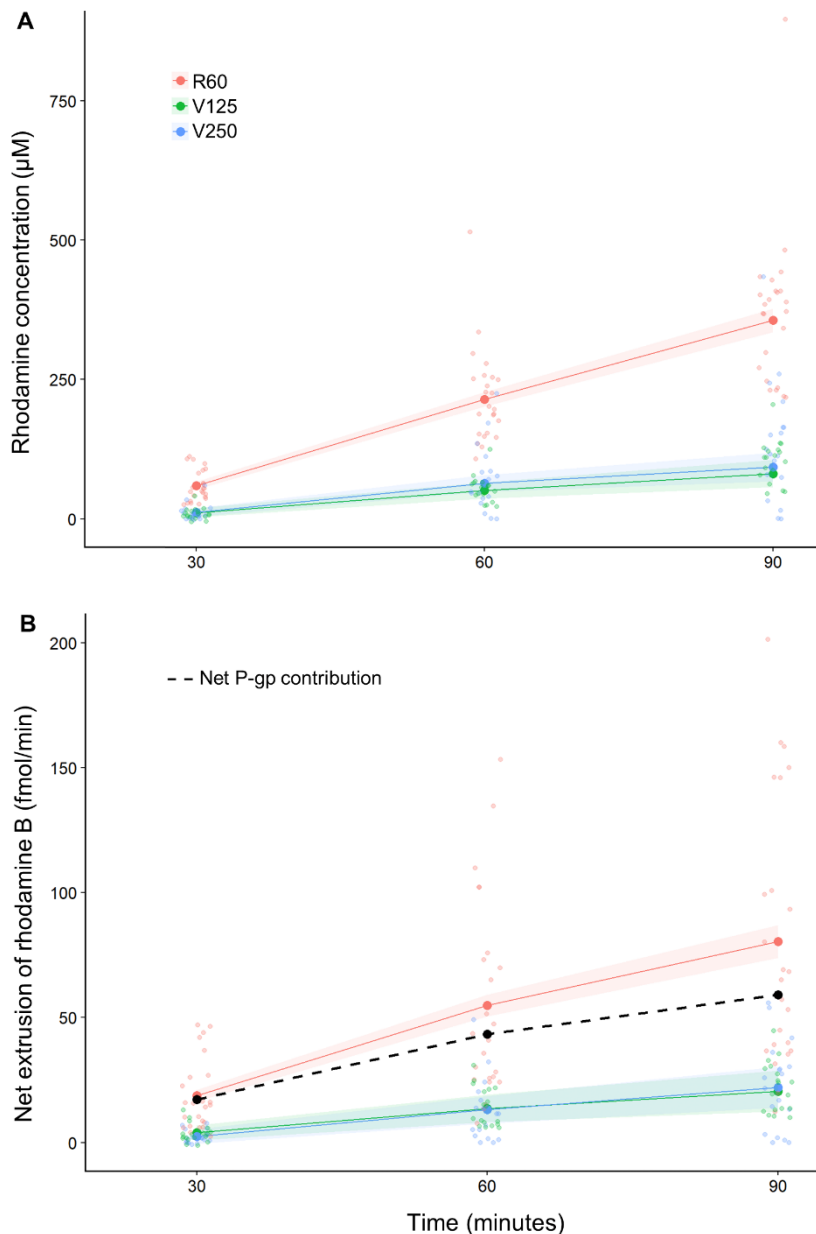

345 **Fig 4. The mean rhodamine B concentration of the droplets secreted by the Malpighian tubules,**  
346 **and the mean net extrusion of rhodamine B increased over time in all the treatments. (A)** The  
347 addition of verapamil (125 or 250  $\mu\text{M}$ ) reduced the rhodamine B concentration of the droplets secreted  
348 compared with the control treatment 60  $\mu\text{M}$  rhodamine. **(B)** The addition of verapamil (125  $\mu\text{M}$  or 250  
349  $\mu\text{M}$ ) reduced the net extrusion of rhodamine B compared with the control treatment 60  $\mu\text{M}$  rhodamine.  
350 The dashed line represents the net contribution of the P-glycoproteins obtained by subtracting the net  
351 extrusion of rhodamine in the V250 treatment from the R60. Each line with shaded region represents  
352 the mixed effect model fit with the standard error. Small circles represent the raw data.

Rossi *et al.*, 2019

353

354

355

356

357

358

359

360

361

362

363

364

365

366

367

368

369

370

We calculated the total number of moles of rhodamine B extruded by the Malpighian tubules per minute as the product of the secretion rate and the rhodamine B concentration of the droplets secreted, which we termed the net extrusion rate. There was an interaction between treatment, time and surface ( $F_{4,74,59}=2.56$ ,  $p=0.046$ ; Table 3, Figs 4B,5A-C), indicating that the dependency of the net extrusion of rhodamine B upon tubule surface area was influenced by the incubation time and the treatment (Table 3A,E, Fig 5A-C). The net extrusion increased significantly between 30 and 60 minutes in all the treatments (Table 3B, Fig 4B). In contrast, between 60 and 90 minutes the net extrusion increased only for the tubules incubated in R60 and V250, whereas it remained steady for V125 treatments (Table 3B, Fig 4B). In particular, the net extrusion was more pronounced in the R60 treatment compared to V125 and V250 (Table 3C, Fig 4B). At each time point, the treatment affected the net extrusion of rhodamine B (Table 3D, Fig 4B). In comparison to the R60 treatment, the addition of verapamil in the V125 and V250 treatments significantly reduced the net extrusion of rhodamine B after 30, 60 and 90 minutes, however, there was no significant difference between the V125 and V250 treatments (Table 3D, Fig 4B).

**Table 3. Outcomes of a linear mixed model to investigate the effect of incubation time and treatment on the net quantity of rhodamine extruded in the droplets secreted per minute.**

|   |                | Treatment             | Time 30<br>Mean $\pm$ se | Time 60<br>Mean $\pm$ se | Time 90<br>Mean $\pm$ se | Total<br>Mean |
|---|----------------|-----------------------|--------------------------|--------------------------|--------------------------|---------------|
| A | Net Rho        | R60                   | 19.5 $\pm$ 2.5           | 58.9 $\pm$ 4.7           | 87.4 $\pm$ 7.0           | 165.8         |
|   | extrusion rate | V125                  | 3.7 $\pm$ 2.8            | 14.0 $\pm$ 5.3           | 21.5 $\pm$ 8.0           | 39.2          |
|   | (fmol/min)     | V250                  | 2.3 $\pm$ 2.9            | 13.5 $\pm$ 5.4           | 22.2 $\pm$ 8.0           | 38.0          |
|   |                | Net P-gp contribution | 17.2 (88%)               | 45.4 (77%)               | 65.2 (75%)               | 127.8 (77%)   |

371

|   | Treatment    | Time 60 vs time 30 |         | Time 90 vs time 60 |         |
|---|--------------|--------------------|---------|--------------------|---------|
|   |              | estimate $\pm$ se  | P-value | estimate $\pm$ se  | P-value |
| B | R60          | 39.5 $\pm$ 3.1     | <.001   | 28.5 $\pm$ 3.1     | <.001   |
|   | V125         | 10.3 $\pm$ 3.5     | 0.013   | 7.5 $\pm$ 3.5      | 0.092   |
|   | V250         | 11.2 $\pm$ 3.6     | 0.006   | 8.7 $\pm$ 3.6      | 0.046   |
| C | V125 vs R60  | -29.2 $\pm$ 4.7    | <.001   | -21.0 $\pm$ 4.7    | <.001   |
|   | V250 vs R60  | -28.2 $\pm$ 4.8    | <.001   | -19.8 $\pm$ 4.8    | <.001   |
|   | V250 vs V125 | 1.0 $\pm$ 5.0      | 0.981   | 1.2 $\pm$ 5.0      | 0.971   |

372

373

374

Rossi *et al.*, 2019

375  
376

| Treatment            | Time 30       |         | Time 60       |         | Time 90       |         |
|----------------------|---------------|---------|---------------|---------|---------------|---------|
|                      | estimate ± se | P-value | estimate ± se | P-value | estimate ± se | P-value |
| <b>D</b> V125 vs R60 | -15.8 ± 3.8   | <.001   | -44.9 ± 7.1   | <.001   | -65.9 ± 10.6  | <.001   |
| V250 vs R60          | -17.2 ± 3.8   | <.001   | -45.4 ± 7.1   | <.001   | -65.2 ± 10.7  | <.001   |
| V250 vs V125         | -1.4 ± 4      | 0.937   | -0.4 ± 7.6    | 0.998   | 0.7 ± 11.3    | 0.998   |

377

| Treatment     | Time 30            |         | Time 60            |              | Time 90            |         |
|---------------|--------------------|---------|--------------------|--------------|--------------------|---------|
|               | surface trend ± se | P-value | surface trend ± se | P-value      | surface trend ± se | P-value |
| R60           | 4.1 ± 3.8          | 0.287   | 23.4 ± 7.0         | <b>0.002</b> | 40.2 ± 10.5        | <.001   |
| <b>E</b> V125 | -1.1 ± 4.8         | 0.818   | 2.2 ± 8.9          | 0.803        | 5.2 ± 13.3         | 0.698   |
| V250          | -1.1 ± 4.4         | 0.811   | 2.2 ± 8.2          | 0.793        | 0.9 ± 12.2         | 0.943   |

378

| Treatment     | Time 30       |             | Time 60       |               | Time 90       |              |       |
|---------------|---------------|-------------|---------------|---------------|---------------|--------------|-------|
|               | SR trend ± se | P-value     | SR trend ± se | P-value       | SR trend ± se | P-value      |       |
| R60           | 63.1 ± 7.2    | <.001       | 192.1 ± 11.0  | <.001         | 254.4 ± 15.2  | <.001        |       |
| <b>F</b> V125 | 12.4 ± 7.4    | 0.749       | 30.4 ± 17.2   | 0.081         | 42.5 ± 34.3   | 0.219        |       |
| V250          | -4.1 ± 5.2    | 0.429       | 53.4 ± 12.1   | <.001         | 79.2 ± 22.5   | <.001        |       |
| <b>G</b>      | estimate ± se | P-value     | estimate ± se | P-value       | estimate ± se | P-value      |       |
|               | R60 vs V125   | 60.7 ± 10.3 | <.001         | 161.7 ± 20.45 | <.001         | 211.9 ± 37.5 | <.001 |
|               | R60 vs V250   | 67.2 ± 8.8  | <.001         | 138.6 ± 16.4  | <.001         | 175.2 ± 27.2 | <.001 |
|               | V125 vs V250  | 6.5 ± 9.0   | 0.754         | -23.0 ± 21.1  | 0.522         | -36.7 ± 41.1 | 0.645 |

379

380 The model applied was (Net extrusion of rhodamine ~ surface \* time \* treatment + (1| locust) +  
 381 (1+time|tubule)). (A) Summary of the mean value for each treatment at each time point. (B) Pairwise  
 382 comparisons between time of incubation separately for each treatment. (C) Pairwise comparison of the  
 383 interaction between time and treatment. (D) Pairwise comparisons between treatments separately for  
 384 each time of incubation. (E) Estimates of the influence of each unit of surface (mm<sup>2</sup>) on the quantity of  
 385 rhodamine extruded at each time point. (F,G) Outcomes of the linear mixed effects model to investigate  
 386 the effect of the secretion rate (SR) on the quantity of rhodamine extruded in the droplets secreted. The  
 387 model applied was (Net extrusion of rhodamine ~ secretion rate \* treatment \* time + (1| locust) +  
 388 (1+time|tubule)). The means estimate the influence of each nL/min of secretion rate on the quantity of  
 389 rhodamine extruded.

390

Rossi *et al.*, 2019

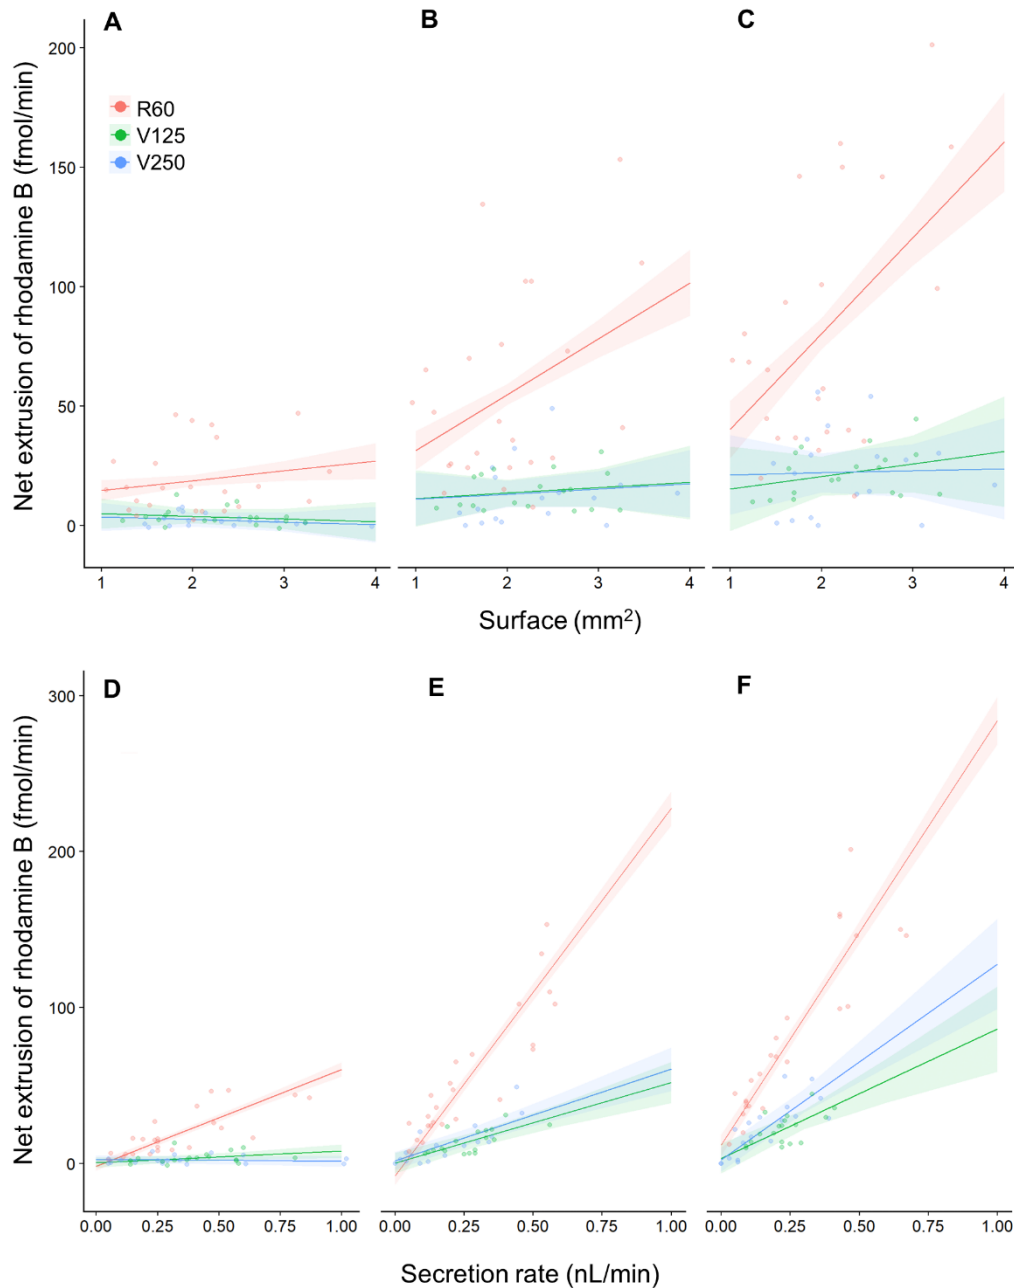

391 **Fig 5. Tubule surface area and the fluid secretion rate positively influences the net extrusion of**  
392 **rhodamine B.** (A) A plot of the surface area of the tubule exposed to the bath versus the net extrusion  
393 of rhodamine B for each of the three treatments after 30 minutes of incubation. (B) As in 'A' but after  
394 60 minutes. (C) As in 'A' but after 90 minutes. (D) A plot of the fluid secretion rate versus the net  
395 extrusion of rhodamine B for each of the three treatments after 30 minutes of incubation. (E) As in 'D'  
396 but after 60 minutes. (F) As in 'D' but after 90 minutes. Small circles indicate the net extrusion of  
397 rhodamine B of individual tubules at a particular time point. Each line with the shaded area around  
398 represents the mixed effect model fit with the standard error.

Rossi *et al.*, 2019

399

400 The surface area positively influenced the net extrusion of rhodamine B in the tubules incubated  
401 for 60 and 90 minutes in the R60 treatment, while there was no correlation between surface area and  
402 net extrusion in V125 and V250 treatments (Table 3E, Fig 5A-C). In addition, we found that after 30  
403 minutes the fluid secretion rate of the tubules incubated in R60 positively influenced the net extrusion  
404 of rhodamine B, while there was no significant effect in the V125 and V250 treatments (Table 3F, Fig  
405 5D). After 60 and 90 minutes, the fluid secretion rate positively correlated with the net extrusion of  
406 rhodamine B in R60 and V250 treatments, but not V125 (Table 3F, Fig 5E,F). Moreover, the secretion  
407 rate of the tubules incubated in R60 showed a more pronounced effect on the net extrusion of rhodamine  
408 B than that of the tubules incubated in V125 and V250 (Table 3G, Fig 5D-F).

409

## 410 **Net contribution of P-glycoproteins**

411 A single Malpighian tubule with a mean surface area incubated in a solution of 60  $\mu$ M rhodamine B,  
412 extruded rhodamine B with a rate of  $19.5 \pm 2.6$  fmol/min in the first 30 minutes,  $58.9 \pm 4.7$  fmol/min  
413 between 30 and 60 minutes and  $87.4 \pm 7.0$  fmol/min between 60 and 90 minutes (Table 3A). The  
414 addition of verapamil significantly reduced the quantity of rhodamine B extruded but did not block it  
415 completely (Table 3A). The rhodamine B concentration of the droplets secreted did not differ between  
416 the V125 and V250 treatments (Table 2A). Therefore, we assumed that 125  $\mu$ M verapamil was  
417 sufficient to inhibit all the P-glycoproteins that are verapamil sensitive and that passive diffusion and  
418 other types of pumps may contribute to extrusion of Rhodamine B. We subtracted the mean values of  
419 the net extrusion of rhodamine B obtained from the V250 treatment from the net extrusion of the R60  
420 treatment to estimate the contribution of the P-glycoproteins alone. The average rates of rhodamine B  
421 extruded by the P-glycoproteins were 17.2 fmol/min, 45.4 fmol/min and 65.2 fmol/min between 0-30,  
422 30-60 and 60-90 minutes respectively (Table 3A, Fig 4B dashed line). In percentage, the P-  
423 glycoproteins are responsible for the 88%, 77% and 75% (between 0-30, 30-60 and 60-90 minutes  
424 respectively) of the total extrusion of rhodamine B. Overall, P-glycoproteins account for the 77% of the  
425 total extrusion of rhodamine B, over the 90 minutes of incubation.

Rossi *et al.*, 2019

426

## 427 **Discussion**

428 Our aim was to determine whether P-glycoprotein transporters are involved in the removal of xenobiotic  
429 substances by Malpighian tubules from the haemolymph of desert locusts and, if so, how they perform  
430 physiologically. To this end, we developed an alternative method to liquid chromatography–mass  
431 spectrometry [37], radiolabelled alkaloids [9] or confocal microscopy [11,12] based upon measuring  
432 dye concentration. A similar method has been used previously to investigate epithelial transport in  
433 tardigrades and desert locusts using chlorophenol red by imaging through the gut or tubules [38]. By  
434 imaging extruded drops from Malpighian tubules, we assessed the performance of epithelial  
435 transporters more accurately than by imaging the lumen of the tubules. We used the P-glycoprotein  
436 substrate rhodamine B [25] and the P-glycoprotein inhibitor verapamil [39] to assay P-glycoprotein  
437 function through the colour of the droplets secreted by the Malpighian tubules. Using this strategy, we  
438 obtained evidence that desert locust Malpighian tubules express a P-glycoprotein transporter, that the  
439 fluid secretion rate of these tubules is proportional to their surface area, and that the fluid secretion rate  
440 influences the net extrusion of rhodamine B.

441

## 442 **A P-glycoprotein transporter extrudes xenobiotics in desert locust**

### 443 **Malpighian tubules**

444 Our conclusion that desert locust Malpighian tubules express P-glycoproteins is supported by two lines  
445 of evidence. Firstly, these tubules actively extrude the dye rhodamine B, a P-glycoprotein substrate  
446 (e.g. [25,26]), when it is present in the solution in which they are incubated. Rhodamine B has been  
447 widely used as a substrate for P-glycoproteins in cell culture and blood brain barrier models (e.g.  
448 [25,26]). Secondly, the addition of verapamil, a P-glycoprotein inhibitor (e.g. [23,27,28,39]),  
449 significantly reduced the extrusion of rhodamine B. The presence of P-glycoproteins in other tissues of  
450 the desert locusts also supports our conclusion that they are expressed in the Malpighian tubules;  
451 proteins with a comparable physiology and similar sequence to the human P-glycoprotein (ABCB1

Rossi *et al.*, 2019

452 gene) are expressed within the blood brain barrier of the locusts *S. gregaria* and *L. migratoria*  
453 [23,37,40,41]. Further support comes from comparison with other insects; P-glycoprotein transporters  
454 have been found in the Malpighian tubules of many other insects including the black field cricket  
455 (*Teleogryllus commodus* [11]), tobacco hornworm (*Manduca sexta* [9,42]), fruit fly (*D. melanogaster*),  
456 kissing bug (*Rhodnius prolixus*), large milkweed bug (*Oncopeltus fasciatus*), yellow fever mosquito  
457 (*Aedes aegypti*), house cricket (*Acheta domesticus*), migratory locust (*Locusta migratoria*), mealworm  
458 beetle (*Tenebrio molitor*), and the American cockroach (*Periplaneta americana*) [15].

459 Rhodamine B extrusion was not blocked entirely by 125  $\mu$ M verapamil or by double this  
460 concentration. Comparison of the extent of the reduction at both concentrations suggests that even at  
461 the lower verapamil concentration all the P-glycoproteins were inhibited. This suggests that  
462 approximately 77% of rhodamine B was transported by P-glycoproteins via a verapamil sensitive  
463 mechanism, whilst the remaining 23% was verapamil insensitive. Moreover, after 90 minutes the  
464 concentration of rhodamine B in the droplets secreted by the Malpighian tubules was higher than that  
465 of the bathing solution suggesting that rhodamine B transport in the presence of verapamil is not simply  
466 due to passive diffusion, but that other active transporters may be implicated. Several potential  
467 candidates for alternative active transporters exist. For example, in human cell lines (Calu-3),  
468 rhodamine B can interact with multiple organic cation transporters (OCT3, OCTN1,2) [43]. Potentially,  
469 however, verapamil may be incapable of blocking rhodamine B transport completely allowing a small  
470 number of rhodamine B molecules to be extruded by the P-glycoprotein even in the presence of  
471 verapamil.

472 Verapamil inhibits P-glycoproteins and does not interact with other multidrug resistance  
473 proteins [44]. This suggests that the effects of verapamil in our experiments are through its specific  
474 effects upon P-glycoproteins. The mechanistic basis of verapamil inhibition is unclear but the most  
475 widely accepted explanation is that P-glycoproteins extrude both verapamil and their substrate but that  
476 verapamil diffuses back across the lipid bilayer much faster than the substrate creating a futile cycle  
477 and thereby competing with the substrate transport [45,46].

478 Verapamil is, however, also a known L-type  $\text{Ca}^{2+}$  channel blocker [47]. In *Drosophila*, L-type  
479  $\text{Ca}^{2+}$  channels are expressed in the basolateral and apical membranes of the tubule principal cells, and



Rossi *et al.*, 2019

480 are involved in the regulation of the fluid secretion [48]. Indeed, an increase of the intracellular  $\text{Ca}^{2+}$   
481 level mediates the effect of diuretic hormones [49]. Verapamil reduced the fluid secretion of *Drosophila*  
482 Malpighian tubules stimulated by peptide agonists (e.g. CAP2b, cGMP) but had no effect on  
483 unstimulated tubules [48]. Our experiments cannot exclude the possibility that verapamil affects  $\text{Ca}^{2+}$   
484 channels in locust Malpighian tubules by interfering with intracellular  $\text{Ca}^{2+}$ , and thereby has an indirect  
485 effect on Rhodamine B extrusion. However, because the fluid secretion rate did not differ between  
486 treatments, the reduction in the net extrusion of rhodamine B was likely caused solely by verapamil  
487 inhibition of the P-glycoproteins. Thus, when considered within the context of the expression of P-  
488 glycoproteins in the blood brain barrier of locusts [23,37,40,41] and the expression of P-glycoproteins  
489 in homologous Malpighian tubules in other insects species (see above), it seems highly likely that the  
490 tubules of gregarious desert locust express P-glycoproteins.

491

## 492 **Malpighian tubule surface area and fluid secretion rate**

493 We used linear mixed effect models to determine which physical feature of a tubule, its surface area,  
494 length or diameter has the greatest influence on fluid secretion rate. We found that the surface area of  
495 the Malpighian tubules positively influences their fluid secretion rate, and more accurately predicts the  
496 fluid secretion rate than tubule diameter or length. Some previous studies have reported that tubule  
497 length was linearly related to the fluid secretion rate [50,51] but in our analysis length was consistently  
498 worse than surface area as a predictor. Even when the surface area (or length) has been accounted for  
499 in previous studies, this has involved dividing the fluid secretion rate by the surface area (or length) to  
500 obtain the fluid secretion rate per unit area (or unit length) [15,52]. Although this approach is useful  
501 when comparing tubules of different sizes from different insect species, it fails to reveal the exact  
502 relationship between the surface area and the fluid secretion rate. Our statistical models demonstrate  
503 that interactions between factors such as surface area and fluid secretion rate depend upon the treatment  
504 applied. For example, our results show that the fluid secretion rate increases with the increasing of the  
505 tubule surface in all the treatments apart from 250  $\mu\text{M}$  verapamil, where the surface no longer influences

Rossi *et al.*, 2019

506 the fluid secretion rate. Such interdependencies are unlikely to be detected or accounted for in simpler  
507 statistical analyses, causing such interdependencies to be ignored.

508

## 509 **Reliability of isolated Malpighian tubule measurements**

510 The decrease in fluid secretion rate that we found is comparable with other studies of isolated  
511 Malpighian tubules, where the fluid secretion rate of tubules incubated in saline decreased of 30% after  
512 20 minutes [53] or over one hour [54]. In contrast, fluid secretion rates have been found steady over  
513 time in studies where the Malpighian tubules were left attached to the gut through the tracheae, and the  
514 whole preparation immersed in saline [6,55]. One of the differences between the isolated tubule assay  
515 and the whole gut assay is the shorter portion of trachea in contact with the tubule immersed in the  
516 bathing solution. Therefore, the reduction of the fluid secretion rate in isolated tubules may be a  
517 consequence of a smaller amount of residual oxygen in the tracheae compared with the whole gut  
518 preparation. Additionally, the volume of the bathing solution in the isolated tubule assay is far smaller  
519 than in the whole gut preparation, which could lead to a quicker depletion of oxygen and/or other  
520 substances in the bathing solution. Replacing the bathing solution with fresh saline produced an increase  
521 in the fluid secretion rate, supporting this interpretation. Finally, there could be a decrease in the tubule  
522 diameter during the assay compared to the *in vivo* preparation. We can safely exclude this, however,  
523 because we found that the tubule diameter was unaffected by the assay and was similar to the tubule's  
524 diameter *in vivo*.

525

## 526 **Determining the transepithelial transport of xenobiotics by P-** 527 **glycoprotein transporters in locust Malpighian tubules**

528 Transepithelial transport of xenobiotics by P-glycoproteins across the inner membrane of the  
529 Malpighian tubules can be determined from the net extrusion rate we measured. The disparity between  
530 the transepithelial transport and the net extrusion rate is due to the properties of rhodamine B. This  
531 lipophilic dye can passively permeate the lipid bilayer of liposomes, following the concentration

Rossi *et al.*, 2019

532 gradient [25]. Likewise, in desert locust Malpighian tubules, rhodamine B can back diffuse into the bath  
533 solution when active transporters increase its luminal concentration creating a concentration gradient.  
534 Consequently, the fluid secretion rate affects the net extrusion rate of rhodamine B because a decrease  
535 in the fluid secretion will increase the luminal concentration of the dye, allowing greater back diffusion  
536 whilst an increase in the fluid secretion rate will have the opposite effect [1]. Therefore, if a dye, like  
537 rhodamine B, can back diffuse, its net extrusion will be proportional to the fluid secretion rate (S6A-C  
538 Fig), while if the dye cannot back diffuse there will be no correlation (S6D-F Fig). When the rhodamine  
539 B concentration in the lumen was lower or similar to the bath (60  $\mu$ M) the net transport would be little  
540 affected by the secretion rate. Conversely, when the luminal rhodamine B concentration was higher  
541 than the bathing solution, part of the dye diffused back, so that the net extrusion was significantly  
542 influenced by the fluid secretion rate.

543         Previous studies demonstrated that Malpighian tubules can exhibit different degrees of passive  
544 permeability to different substances, depending on the species and on the properties (i.e. size, polarity)  
545 of the substrate used (e.g. dyes, alkaloid, drugs) [1]. For example, tubules of the kissing bug (*R.*  
546 *prolixus*) have passive permeability to the alkaloid nicotine [8], but not to the dye indigo carmine [1],  
547 whereas tubules of the blowfly (*Calliphora erythrocephala*) are permeable to indigo carmine [1]. Thus,  
548 when studying the effect of a substance on active transporters, it is important to take into account the  
549 fluid secretion rate because a change in the net extrusion rate of a substrate may be caused not only by  
550 a direct effect on the transporters, but also by an indirect consequence of a change in the fluid flow [12].  
551 In our experiment, the fluid secretion rate did not differ between treatments, indicating that the reduction  
552 of net extrusion of rhodamine B following exposure to verapamil was caused solely by inhibition of the  
553 P-glycoprotein. However, the fluid secretion rate decreased over time, which may produce an  
554 underestimation of the net transepithelial transport of rhodamine B.

555

## 556 **Implications for desert locust detoxification**

557 Gregarious desert locusts feed on a broad variety of plants including species containing secondary  
558 metabolites such as atropine to become unpalatable to predators [17–20]. The expression of P-

Rossi *et al.*, 2019

559 glycoproteins in the Malpighian tubules to extrude noxious substances may be an adaptation to cope  
560 with the ingestion of toxic plants. This may also be the reason for expression of P-glycoproteins on the  
561 blood brain barrier of desert locusts, which would prevent the uptake of hydrophobic substances in the  
562 central nervous system [23]. Yet the relationship between ingesting toxins and detoxification pathways  
563 in the Malpighian tubules is not straightforward; some species of Orthoptera, as well as Coleoptera,  
564 Lepidoptera, Heteroptera, Hymenoptera and Sternorrhyncha [56], sequester toxins from the plants they  
565 ingest to deter predators. However, toxicity may also be conferred by gut contents, rather than through  
566 sequestration within bodily tissues. For example, the chemical defence of the spotted bird grasshopper,  
567 *Schistocerca emarginata* (=lineata), is mediated by the contents of toxic plant in its gut [21,22]. This  
568 species is a congener of the desert locust, *S. gregaria*, which suggests that a similar strategy may be  
569 involved in the production of toxicity in this species. If this is the case, then the presence of toxins in  
570 the haemolymph may be a consequence of ingesting toxic plant material for storage within the gut. In  
571 such a scenario, detoxification pathways within the Malpighian tubules would then be essential for  
572 ensuring that toxins do not accumulate within the haemolymph to concentrations that would affect  
573 physiological processes.

574         The P-glycoprotein detoxification pathway that we have characterised in desert locusts is likely  
575 to be highly effective in extruding xenobiotic compounds from haemolymph, especially when the  
576 number of Malpighian tubules within an individual locust is considered. However, it is important to  
577 consider that the locusts used for our experiments have experienced a diet free of toxins, such as  
578 atropine. P-glycoprotein expression can be modulated depending on the diet [57]; *Drosophila* larvae  
579 fed on colchicine increased the expression of the P-glycoprotein gene homologue *mdr49* in the brain  
580 and gut. Consequently, adult gregarious desert locusts that have fed on a diet including plant toxins may  
581 have even stronger P-glycoprotein detoxification pathways. In contrast to their gregarious counterparts,  
582 solitary desert locusts actively avoid plants containing atropine [17], and find odours associated with it  
583 aversive [58]. Thus, Malpighian tubules of solitary desert locusts may express fewer P-glycoproteins  
584 than those of the gregarious phase, possibly due to their reduced exposure to secondary metabolites  
585 from their diet.

586

Rossi *et al.*, 2019

## 587 **Implications for insect pest control**

588 P-glycoproteins are implicated in the resistance of some insect pests to insecticides [59] promoting the  
589 efflux of various xenobiotics thereby decreasing the intracellular drug accumulation. For instance, P-  
590 glycoproteins have been detected in a resistant strain of the pest cotton bollworm (*Helicoverpa*  
591 *armigera*) but not in a susceptible one [60]. P-glycoproteins have also been implicated in the protection  
592 of the mitochondria from insecticide damage [61]. In Africa and Asia, applications of insecticides are  
593 carried out to try to control desert locust plagues [62]. To increase the efficacy, a combination of P-  
594 glycoprotein inhibitors and insecticide may act synergistically to increase the locust mortality, reducing  
595 the amount of insecticide used. Further investigation into the interaction between P-glycoproteins and  
596 different xenobiotics (i.e. insecticides, herbicides, miticides and secondary metabolites) may improve  
597 our understanding of the physiological effect of pesticides on insects, and subsequently lead to the  
598 development of more specific targeted insecticides.

599

## 600 **Acknowledgements**

601 M.R. was financially supported by a graduate studentship from the School of Life Sciences, University  
602 of Sussex. D.D.B was financially supported by the Welsh government/HEFCW RESILCOAST project.

603

## 604 **Author contributions**

605 M.R. and J.E.N conceived the experiment; M.R. and J.E.N designed the experiments. M.R. carried out  
606 the experiments, analysed the images and carried out the data analyses. D.D.B provided help for the  
607 statistical analyses. M.R. and J.E.N wrote the manuscript.

608

## 609 **References**

610 1. Maddrell SH, Gardiner BO, Pilcher DE, Reynolds SE. Active transport by insect Malpighian  
611 tubules of acidic dyes and of acylamides. *J Exp Biol.* 1974 Oct 1;61(2):357-77.

Rossi *et al.*, 2019

- 612 2. Ramsay JA. Excretion by the Malpighian tubules of the stick insect, *Dixippus morosus*  
613 (Orthoptera, Phasmidae): amino acids, sugars and urea. *J Exp Biol.* 1958 Dec 1;35(4):871-91.
- 614 3. Phillips JE. Rectal absorption in the desert locust, *Schistocerca gregaria* Forskal. I. *J Exp Biol.*  
615 1964 Mar;41:15-38.
- 616 4. O'Donnell M. Insect excretory mechanisms. *Adv In Insect Phys.* 2008 Jan 1;35:1-122..
- 617 5. Williams JC, Hagedorn HH, Beyenbach KW. Dynamic changes in flow rate and composition of  
618 urine during the post-bloodmeal diuresis in *Aedes aegypti* (L.). *J Comp Physiol B.* 1983 Jun  
619 21;153(2):257-65.
- 620 6. Maddrell SH, Klunswan S. Fluid secretion by in vitro preparations of the Malpighian tubules of  
621 the desert locust *Schistocerca gregaria*. *J Insect Physiol.* 1973 Jul 1;19(7):1369-76.
- 622 7. Wieczorek HE. The insect V-ATPase, a plasma membrane proton pump energizing secondary  
623 active transport: molecular analysis of electrogenic potassium transport in the tobacco hornworm  
624 midgut. *J Exp Biol.* 1992 Nov 1;172(1):335-43.
- 625 8. Maddrell SH, Gardiner BO. Excretion of alkaloids by Malpighian tubules of insects. *J Exp Biol.*  
626 1976 Apr 1;64(2):267-81.
- 627 9. Gaertner LS, Murray CL, Morris CE. Transepithelial transport of nicotine and vinblastine in  
628 isolated Malpighian tubules of the tobacco hornworm (*Manduca sexta*) suggests a P-glycoprotein-  
629 like mechanism. *J Exp Biol.* 1998 Sep 15;201(18):2637-45.
- 630 10. Karnaky Jr KJ, Petzel D, Sedmerova M, Gross A, Miller DS. Mrp2-like transport of Texas Red  
631 by Malpighian tubules of the common American cockroach, *Periplaneta americana*. *Bull Mt Des*  
632 *Isl Biol Lab.* 2000;39:52-3.
- 633 11. Leader JP, O'Donnell MJ. Transepithelial transport of fluorescent p-glycoprotein and MRP2  
634 substrates by insect Malpighian tubules: confocal microscopic analysis of secreted fluid droplets.  
635 *J Exp Biol.* 2005 Dec 1;208(23):4363-76.
- 636 12. O'Donnell MJ, Leader JP. Changes in fluid secretion rate alter net transepithelial transport of  
637 MRP2 and P-glycoprotein substrates in Malpighian tubules of *Drosophila melanogaster*. *Arch*  
638 *Insect Biochem Physiol: Published in Collaboration with the Entomological Society of America.*  
639 2006 Nov;63(3):123-34.

Rossi *et al.*, 2019

- 640 13. Wright SH, Dantzler WH. Molecular and cellular physiology of renal organic cation and anion  
641 transport. *Physiol Rev.* 2004 Jul;84(3):987-1049.
- 642 14. Hawthorne DJ, Dively GP. Killing them with kindness? In-hive medications may inhibit  
643 xenobiotic efflux transporters and endanger honey bees. *PLoS One.* 2011 Nov 2;6(11):e26796.
- 644 15. Rheault MR, Plaumann JS, O'Donnell MJ. Tetraethylammonium and nicotine transport by the  
645 Malpighian tubules of insects. *J Insect Physiol.* 2006 May 1;52(5):487-98.
- 646 16. Guseman AJ, Miller K, Kunkle G, Dively GP, Pettis JS, Evans JD, Hawthorne DJ. Multi-drug  
647 resistance transporters and a mechanism-based strategy for assessing risks of pesticide  
648 combinations to honey bees. *PLoS One.* 2016 Feb 3;11(2):e0148242.
- 649 17. Despland E, Simpson SJ. Food choices of solitary and gregarious locusts reflect cryptic and  
650 aposematic antipredator strategies. *Anim Behav.* 2005 Feb 1;69(2):471-9.
- 651 18. Mainguet AM, Louveaux A, El Sayed G, Rollin P. Ability of a generalist insect, *Schistocerca*  
652 *gregaria*, to overcome thioglucoside defense in desert plants: tolerance or adaptation?. *Entomol*  
653 *Exp Appl.* 2000 Mar;94(3):309-17.
- 654 19. Sword GA, Simpson SJ, El Hadi OT, Wilps H. Density-dependent aposematism in the desert  
655 locust. *Proc R Soc Lond B Biol Sci.* 2000 Jan 7;267(1438):63-8.
- 656 20. Pener MP, Simpson SJ. Locust phase polyphenism: an update. *Adv Insect Phys.* 2009 Jan 1;36:1-  
657 272.
- 658 21. Sword GA. Tasty on the outside, but toxic in the middle: grasshopper regurgitation and host plant-  
659 mediated toxicity to a vertebrate predator. *Oecologia.* 2001 Aug 1;128(3):416-21.
- 660 22. Sword GA. Density-dependent warning coloration. *Nature.* 1999 Jan;397(6716):217.
- 661 23. Andersson O, Badisco L, Hansen AH, Hansen SH, Hellman K, Nielsen PA, et al. Characterization  
662 of a novel brain barrier ex vivo insect-based P-glycoprotein screening model. *Pharmacol Res*  
663 *Perspect.* 2014 Aug;2(4):e00050.
- 664 24. Ramsay JA. Active transport of water by the Malpighian tubules of the stick insect, *Dixippus*  
665 *morosus* (Orthoptera, Phasmidae). *J Exp Biol.* 1954 Mar 1;31(1):104-13.

Rossi *et al.*, 2019

- 666 25. Eytan GD, Regev R, Oren G, Hurwitz CD, Assaraf YG. Efficiency of P-glycoprotein-mediated  
667 exclusion of rhodamine dyes from multidrug-resistant cells is determined by their passive  
668 transmembrane movement rate. *Eur J Biochem.* 1997 Aug;248(1):104-12.
- 669 26. Mayer F, Mayer N, Chinn L, Pinsonneault RL, Kroetz D, Bainton RJ. Evolutionary conservation  
670 of vertebrate blood-brain barrier chemoprotective mechanisms in *Drosophila*. *J Neurosci.* 2009  
671 Mar 18;29(11):3538-50.
- 672 27. Dermauw W, Van Leeuwen T. The ABC gene family in arthropods: comparative genomics and  
673 role in insecticide transport and resistance. *Insect Biochemi Mol Biol.* 2014 Feb 1;45:89-110.
- 674 28. Hamada H, Hagiwara KI, Nakajima T, Tsuruo T. Phosphorylation of the Mr 170,000 to 180,000  
675 glycoprotein specific to multidrug-resistant tumor cells: effects of verapamil, trifluoperazine, and  
676 phorbol esters. *Cancer Res.* 1987 Jun 1;47(11):2860-5.
- 677 29. Schneider CA, Rasband WS, Eliceiri KW. NIH Image to ImageJ: 25 years of image analysis.  
678 *Nature Methods.* 2012 Jun 28;9(7):671.
- 679 30. R Core Team. R: A language and environment for statistical computing. R J, 2012.
- 680 31. Bates D, Mächler M, Bolker B, Walker S. Fitting linear mixed-effects models using lme4. 2014  
681 Jun 23. Available from: <https://arxiv.org/abs/1406.5823>
- 682 32. Akaike H. Information theory and an extension of the maximum likelihood principle. Selected  
683 papers of Hirotugu Akaike: Springer; 1998. p. 199–213
- 684 33. Kuznetsova A, Brockhoff PB, Christensen RH. lmerTest package: tests in linear mixed effects  
685 models. *J Stat Softw.* 2017;82(13).
- 686 34. Forstmeier W, Schielzeth H. Cryptic multiple hypotheses testing in linear models: overestimated  
687 effect sizes and the winner's curse. *Behav Ecol Sociobiol.* 2011 Jan 1;65(1):47-55.
- 688 35. Lenth R, Lenth MR. Package 'lsmeans'. *Am Stat.* 2018 Nov 2;34(4):216-21.
- 689 36. Wickham H. *ggplot2: elegant graphics for data analysis.* Springer; 2016 Jun 8.
- 690 37. Andersson O, Hansen SH, Hellman K, Olsen LR, Andersson G, Badolo L, et al. The grasshopper:  
691 a novel model for assessing vertebrate brain uptake. *J Pharmacol Exp Ther.* 2013 Aug  
692 1;346(2):211-8.



Rossi *et al.*, 2019

- 693 38. Halberg KA, Møbjerg N. First evidence of epithelial transport in tardigrades: a comparative  
694 investigation of organic anion transport. *J Exp Biol.* 2012 Feb 1;215(3):497-507.
- 695 39. Tsuruo T, Iida H, Tsukagoshi S, Sakurai Y. Overcoming of vincristine resistance in P388  
696 leukemia *in vivo* and *in vitro* through enhanced cytotoxicity of vincristine and vinblastine by  
697 verapamil. *Cancer Res.* 1981 May 1;41(5):1967-72.
- 698 40. Al-Qadi S, Schiøtt M, Hansen SH, Nielsen PA, Badolo L. An invertebrate model for CNS drug  
699 discovery: Transcriptomic and functional analysis of a mammalian P-glycoprotein ortholog.  
700 *Biochim Biophys Acta Gen Subj.* 2015 Dec 1;1850(12):2439-51.
- 701 41. Nielsen PA, Andersson O, Hansen SH, Simonsen KB, Andersson G. Models for predicting blood–  
702 brain barrier permeation. *Drug Discov Today.* 2011 Jun 1;16(11-12):472-5.
- 703 42. Murray CL, Quaglia M, Arnason JT, Morris CE. A putative nicotine pump at the metabolic blood–  
704 brain barrier of the tobacco hornworm. *J Neurobi.* 1994 Jan;25(1):23-34.
- 705 43. Ugwu MC, Oli A, Esimone CO, Agu RU. Organic cation rhodamines for screening organic cation  
706 transporters in early stages of drug development. *J Pharmacol Toxicol Methods.* 2016 Nov 1;82:9-  
707 19.
- 708 44. Cole SP, Downes HF, Slovak ML. Effect of calcium antagonists on the chemosensitivity of two  
709 multidrug-resistant human tumour cell lines which do not overexpress P-glycoprotein. *Br J*  
710 *Cancer.* 1989 Jan;59(1):42.
- 711 45. Eytan GD, Regev R, Oren G, Assaraf YG. The role of passive transbilayer drug movement in  
712 multidrug resistance and its modulation. *J Biol Chem.* 1996 May 31;271(22):12897-902.
- 713 46. Sharom FJ. The P-glycoprotein efflux pump: how does it transport drugs?. *J Membr Biol.* 1997  
714 Dec 24;160(3):161-75.
- 715 47. Abernethy DR, Schwartz JB. Calcium-antagonist drugs. *N Engl J Med.* 1999 Nov  
716 4;341(19):1447-57.
- 717 48. MacPherson MR, Pollock VP, Broderick KE, Kean LA, O Connell FC, Dow JA, et al. Model  
718 organisms: new insights into ion channel and transporter function L-type calcium channels  
719 regulate epithelial fluid transport in *Drosophila melanogaster*. *Am J Physiol.* 2001 Feb  
720 1;280(1):C394-407.

Rossi *et al.*, 2019

- 721 49. Paluzzi JP, Yeung C, O'Donnell MJ. Investigations of the signaling cascade involved in diuretic  
722 hormone stimulation of Malpighian tubule fluid secretion in *Rhodnius prolixus*. *J Insect Physiol.*  
723 2013 Dec 1;59(12):1179-85.
- 724 50. Beyenbach KW, Oviedo A, Aneshansley DJ. Malpighian tubules of *Aedes aegypti*: five tubules,  
725 one function. *J Insect Physiol.* 1993 Aug 1;39(8):639-48.
- 726 51. Coast GM. Fluid secretion by single isolated Malpighian tubules of the house cricket, *Acheta*  
727 *domesticus*, and their response to diuretic hormone. *Physiol Entomol.* 1988 Dec;13(4):381-91.
- 728 52. Bradley TJ. Functional design of microvilli in the Malpighian tubules of the insect *Rhodnius*  
729 *prolixus*. *J Cell Sci.* 1983 Mar 1;60(1):117-35.
- 730 53. Coast GM, Rayne RC, Hayes TK, Mallet AI, Thompson KS, Bacon JP. A comparison of the  
731 effects of two putative diuretic hormones from *Locusta migratoria* on isolated locust Malpighian  
732 tubules. *J Exp Biol.* 1993 Feb 1;175(1):1-4.
- 733 54. Proux JP, Picquot M, Herault JP, Fournier B. Diuretic activity of a newly identified  
734 neuropeptide—the arginine-vasopressin-like insect diuretic hormone: use of an improved  
735 bioassay. *J Insect Physiol.* 1988 Jan 1;34(10):919-27.
- 736 55. James PJ, Kershaw MJ, Reynolds SE, Charnley AK. Inhibition of desert locust (*Schistocerca*  
737 *gregaria*) Malpighian tubule fluid secretion by destruxins, cyclic peptide toxins from the insect  
738 pathogenic fungus *Metarhizium anisopliae*. *J Insect Physiol.* 1993 Sep 1;39(9):797-804.
- 739 56. Opitz SE, Müller C. Plant chemistry and insect sequestration. *Chemoecology.* 2009 Sep  
740 1;19(3):117.
- 741 57. Tapadia MG, Lakhota SC. Expression of mdr49 and mdr65 multidrug resistance genes in larval  
742 tissues of *Drosophila melanogaster* under normal and stress conditions. *Cell stress Chaperones.*  
743 2005 Mar;10(1):7.
- 744 58. Simões PM, Niven JE, Ott SR. Phenotypic transformation affects associative learning in the desert  
745 locust. *Curr Biol.* 2013 Dec 2;23(23):2407-12.
- 746 59. Lanning CL, Fine RL, Corcoran JJ, Ayad HM, Rose RL, Abou-Donia MB. Tobacco budworm P-  
747 glycoprotein: biochemical characterization and its involvement in pesticide resistance. *Biochim*  
748 *Biophys Acta Gen Subj.* 1996 Oct 24;1291(2):155-62.

Rossi *et al.*, 2019

- 749 60. Srinivas R, Udikeri SS, Jayalakshmi SK, Sreeramulu K. Identification of factors responsible for  
750 insecticide resistance in *Helicoverpa armigera*. *Comp Biochem Physiol C Toxicol Pharmacol*.  
751 2004 Mar 1;137(3):261-9.
- 752 61. Akbar SM, Aurade RM, Sharma HC, Sreeramulu K. Mitochondrial P-glycoprotein ATPase  
753 contributes to insecticide resistance in the cotton bollworm, *Helicoverpa armigera* (Noctuidae:  
754 Lepidoptera). *Cell Biochem Biophys*. 2014 Sep 1;70(1):651-60.
- 755 62. Van Huis A. Strategies to control the Desert Locust *Schistocerca gregaria*. In: Vreysen MJB,  
756 Robinson AS, and Hendrichs J, editors. Area-wide control of insect pests. From research to field  
757 implementation. Springer, Dordrecht; 2007. p. 285-296.
- 758
- 759

Rossi *et al.*, 2019

## 760 Supporting information

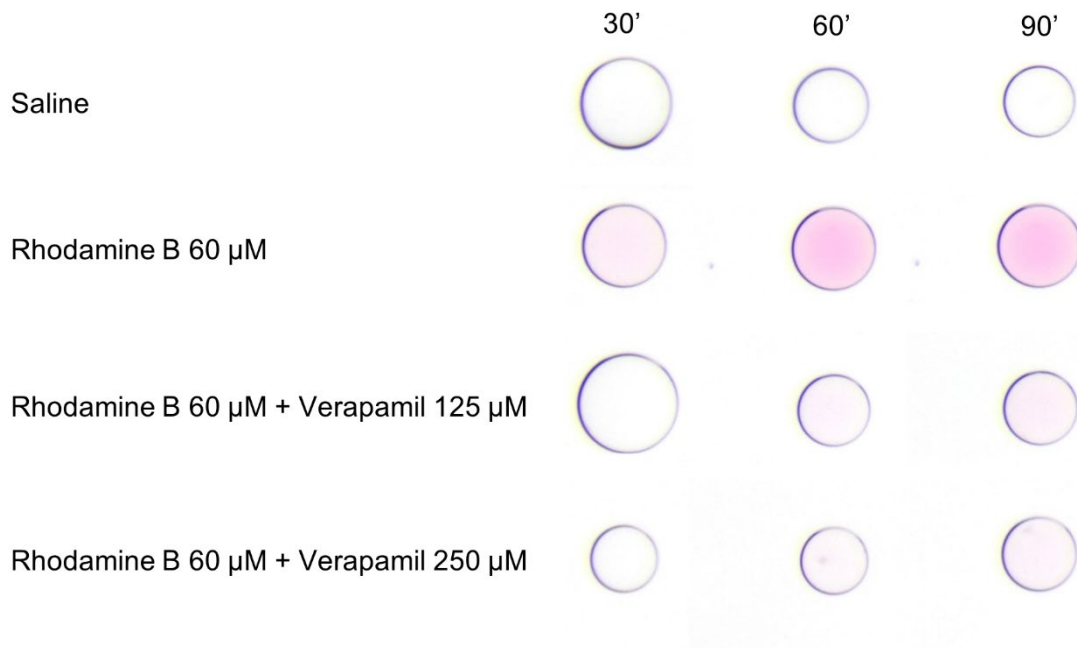

761 **S1 Fig. Examples of the droplets secreted by the Malpighian tubules of desert locusts during the**  
762 **incubation in each of the different treatments every 30 minutes.** The size of each droplet depends  
763 upon the fluid secretion rate whilst the colour is determined by the net extrusion rate of rhodamine B.  
764

Rossi *et al.*, 2019

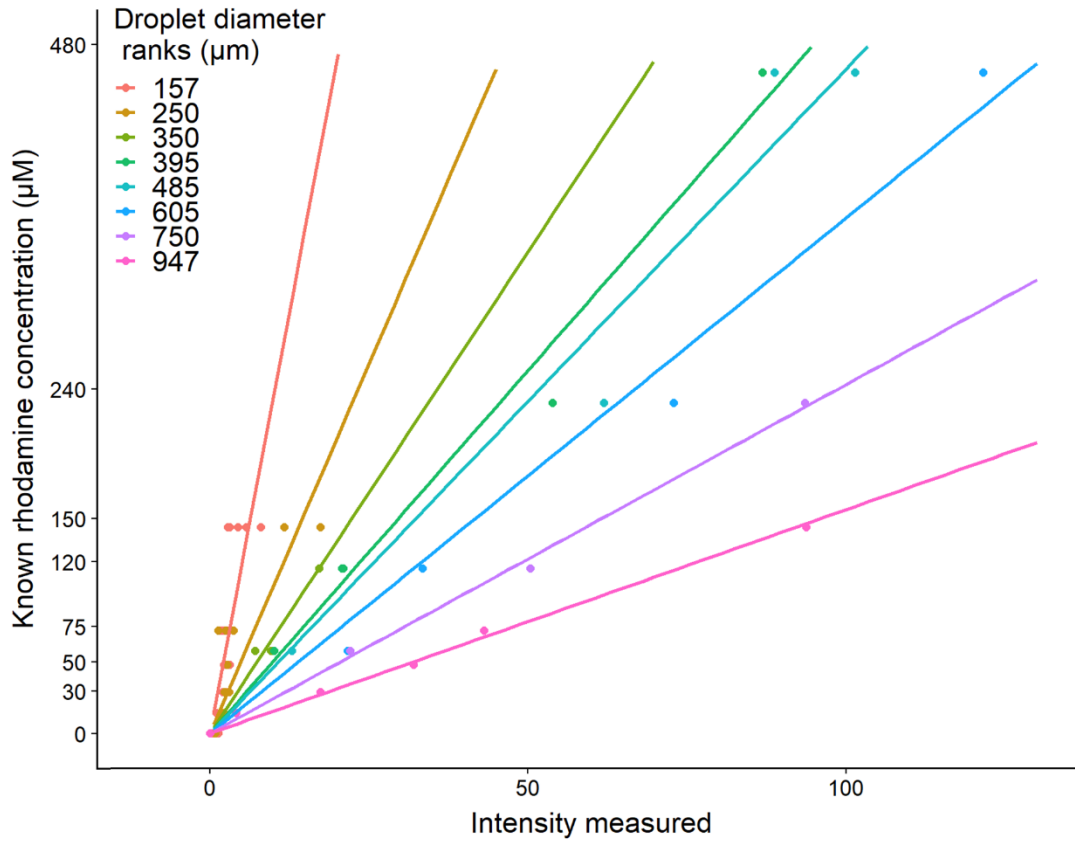

765 **S2 Fig. Calibration lines used to determine the rhodamine B concentration in the droplets**  
766 **secreted by the Malpighian tubules.** For each droplet diameter rank there is a linear relationship  
767 between the rhodamine concentration of the droplet and the colour intensity measured. The slope of the  
768 lines decreases as the diameter increases. We estimated the rhodamine B concentration of the droplets  
769 secreted by measuring the colour intensity and the diameter of each droplet. Each line represents the  
770 linear regression fit for each mean diameter rank.  
771

Rossi *et al.*, 2019

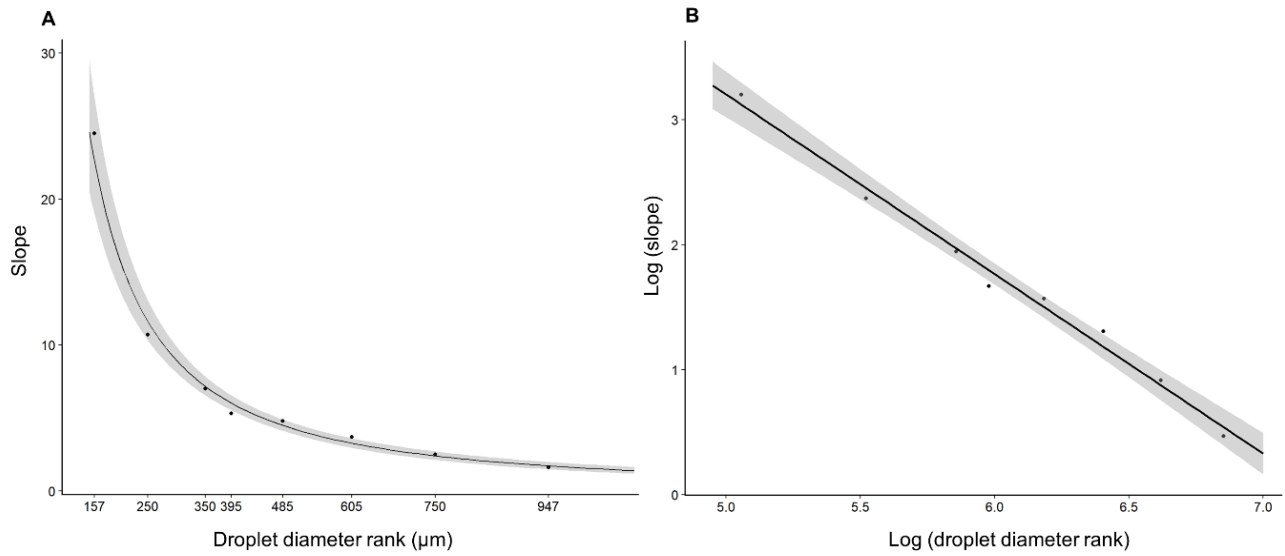

772 **S3 Fig. The relationship between intensity and rhodamine B concentration depends upon droplet**  
773 **diameter. (A)** The slope decreases as the diameter increases, following an exponential decay. **(B)** After  
774 log transformation the relationship becomes linear. Using this linear equation for each droplet diameter  
775 measured, we predicted the slope of the line equation that link the colour intensity to the rhodamine  
776 concentration.  
777

Rossi *et al.*, 2019

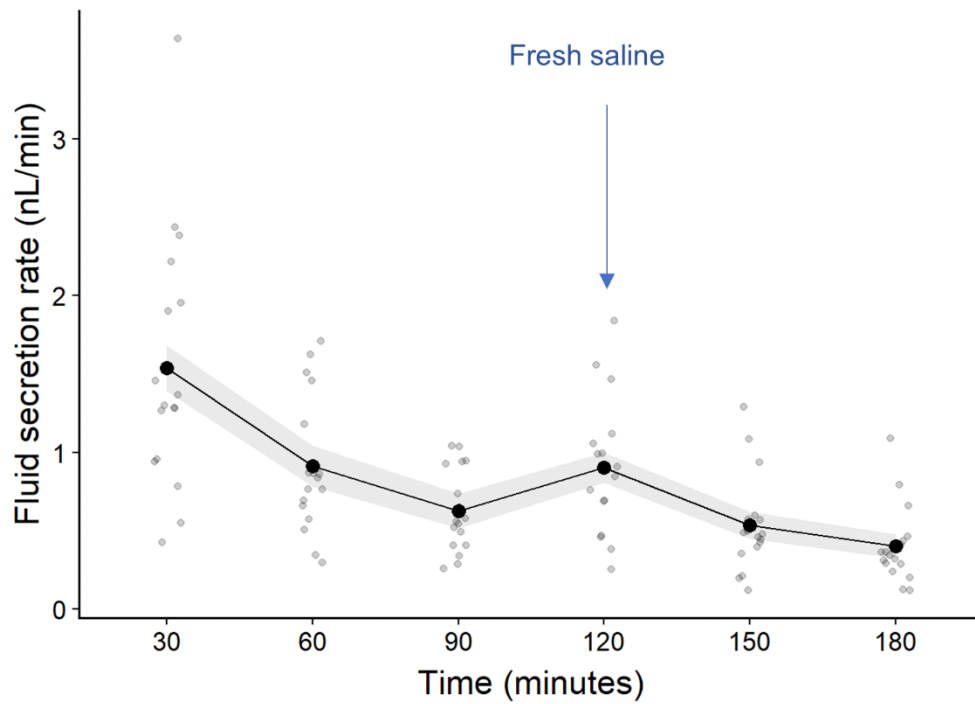

778

779 **S4 Fig. Mean fluid secretion rate of Malpighian tubules increases with fresh saline.** The tubules

780 were incubated in saline but after 90 minutes the saline bath was removed and replaced with fresh

781 saline. The arrow indicates the first measurement taken after the saline had been replaced. Grey points

782 indicate the fluid secretion rate of individual tubules at a particular time point.

783

Rossi *et al.*, 2019

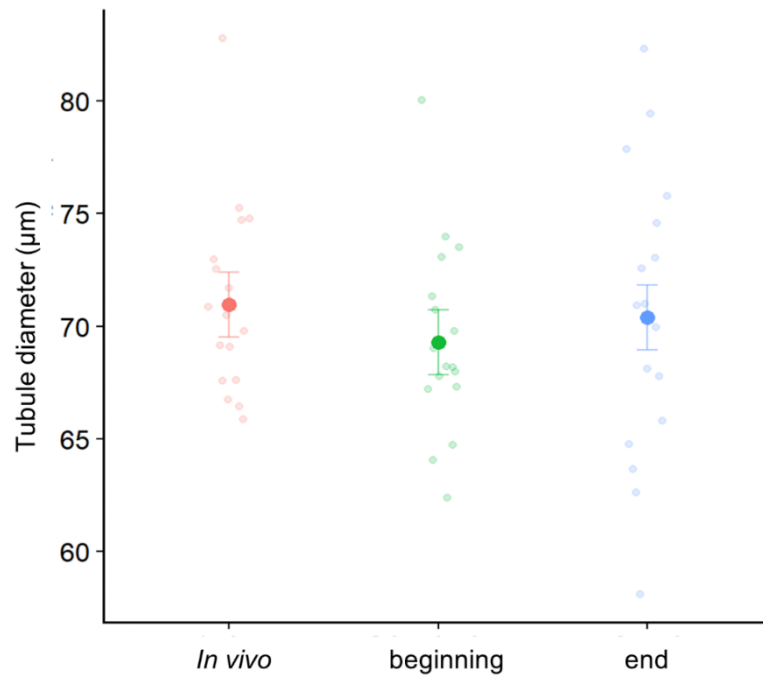

784 **S5 Fig. Manipulation of Malpighian tubules in the Ramsay assay did not affect their diameter.**

785 To exclude the possibility that manipulation during the assay affected tubule morphology, we  
786 measured the tubule's diameter *in vivo*, at the beginning, and at the end of the assay. The diameter  
787 was unaffected by the manipulation.

788



Rossi *et al.*, 2019

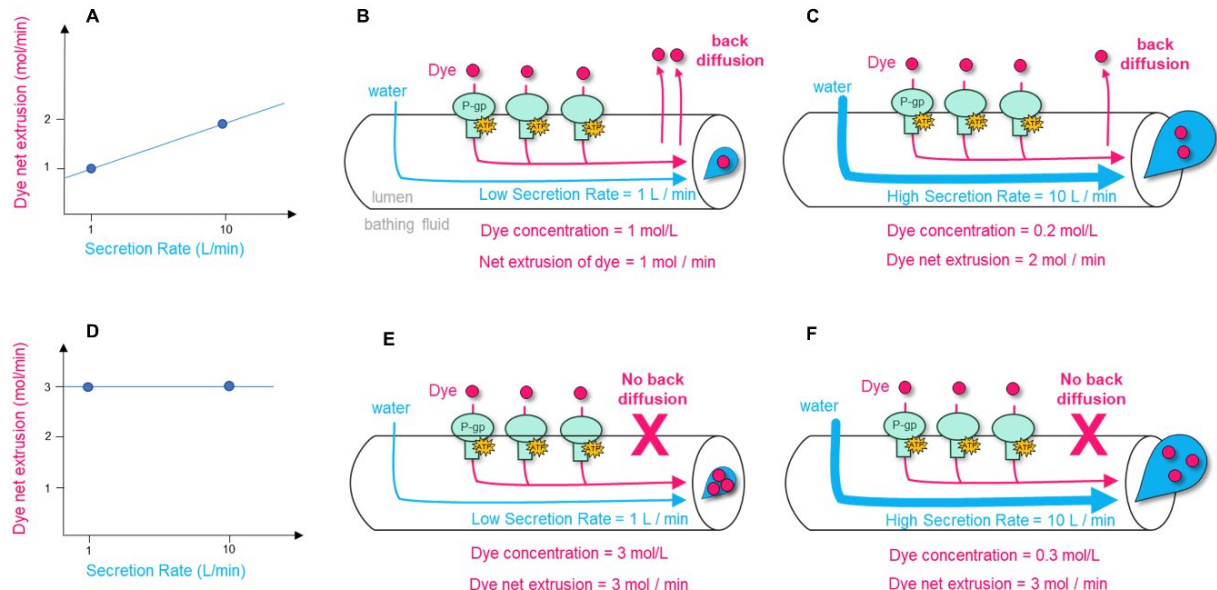

789

790 **S6 Fig. Schematic representation of the influence of the back diffusion on the net extrusion of a**

791 **dye. (A)** The net extrusion of a dye positively correlates with the fluid secretion rate when the dye can

792 back diffuse from the lumen to the bathing fluid. **(B)** Indeed, at low fluid secretion rate, the dye

793 concentration in the lumen rises, increasing the back diffusion and reducing the net transport of the dye.

794 **(C)** Instead, at higher fluid secretion rates, the dye concentration in the lumen is diluted and the back

795 diffusion is reduced, increasing the net transport of the dye. **(D)** If no back diffusion occurs, there is no

796 correlation between the net transport of the dye and the fluid secretion rate. **(E,F)** At any rate of fluid

797 secretion, the net transport of the dye remains constant, independently of the dye concentration in the

798 lumen.

799

Rossi *et al.*, 2019

800 **S1 Table. Comparison of linear mixed effect models incorporating length, diameter or surface**  
801 **area.** Based on the lowest AIC parameter, the surface area was the best explanatory variable for the  
802 secretion rate. The row in bold indicates the model with the lowest AIC. Only the fixed effects are  
803 shown.

| <u>model</u>                                              | <u>df</u> | <u>AIC</u>     | <u>BIC</u>     | <u>LogLik</u> | <u>deviance</u> |
|-----------------------------------------------------------|-----------|----------------|----------------|---------------|-----------------|
| secretion rate ~ diameter * time + treatment * time       | 20        | -318.14        | -249.12        | 179.07        | -358.14         |
| secretion rate ~ length * time + treatment * time         | 20        | -312.61        | -243.59        | 176.30        | -352.61         |
| <b>secretion rate ~ surface * time + treatment * time</b> | <b>20</b> | <b>-326.81</b> | <b>-257.79</b> | <b>183.40</b> | <b>-366.81</b>  |

Rossi *et al.*, 2019

804 **S2 Table. Outcomes of the linear mixed effect model investigating the effect the replacement of**  
805 **the saline with a fresh saline after 90 minutes of incubation upon the fluid secretion rate.** The  
806 model applied was (Secretion rate ~ surface + time + (1|locust) + (1+time|tubule)). The rows in bold  
807 indicate the first observation after the saline has been replaced. (A) Summary of the mean values of  
808 fluid secretion rate at each time point. (B) Pairwise comparisons between subsequent times of  
809 incubation.  
810

| <b>A</b>                         |                 |            | <b>B</b>           |                          |                    |                 |
|----------------------------------|-----------------|------------|--------------------|--------------------------|--------------------|-----------------|
|                                  | Time            | Mean ± SE  | Contrasts          | estimate ± SE            | P-value            |                 |
| Fluid secretion<br>rate (nL/min) | Saline 1        | 30         | 1.54 ± 0.15        | 60 min vs 30 min         | -0.63 ± 0.08       | <b>&lt;.001</b> |
|                                  | Saline 1        | 60         | 0.91 ± 0.13        | 90 min vs 60 min         | -0.28 ± 0.08       | <b>0.006</b>    |
|                                  | Saline 1        | 90         | 0.63 ± 0.12        | <b>120 min vs 90 min</b> | <b>0.28 ± 0.08</b> | <b>0.008</b>    |
|                                  | <b>Saline 2</b> | <b>120</b> | <b>0.90 ± 0.10</b> | 150 min vs 120 min       | -0.37 ± 0.08       | <b>&lt;.001</b> |
|                                  | Saline 2        | 150        | 0.53 ± 0.09        | 180 min vs 150 min       | -0.14 ± 0.08       | 0.500           |
|                                  | Saline 2        | 180        | 0.40 ± 0.09        |                          |                    |                 |

Rossi *et al.*, 2019

811 **S3 Table. Outcomes of the linear mixed effect model investigating the diameter of the tubules in**  
812 **different moments during the Ramsay assay.** The model applied was (diameter ~ assay time + (1|  
813 locust) + (1+time|tubule)). (A) Summary of the mean diameter of Malpighian tubules in vivo, at the  
814 beginning of the assay and at the end of the assay after 180 minutes of incubation. (B) Pairwise  
815 comparisons between different moments of the assay.

| <b>A</b>      |                 |            | <b>B</b>                     |               |         |
|---------------|-----------------|------------|------------------------------|---------------|---------|
|               |                 | Mean ± SE  |                              | estimate ± SE | P-value |
| Diameter (µm) | In vivo         | 71.0 ± 1.6 | Beginning assay vs in vivo   | -1.7 ± 1.1    | 0.260   |
|               | Beginning assay | 69.3 ± 1.6 | end assay vs in vivo         | -0.6 ± 1.1    | 0.847   |
|               | End assay       | 70.4 ± 1.6 | end assay vs beginning assay | 1.1 ± 1.1     | 0.551   |
